# Supplementary material for: Combined hormonal contraceptive use is not protective against musculoskeletal conditions or injuries: a systematic review with data from 5 million females
Source: HighWire-hosted journal article supplement (doi:10.1136/bjsports-2022-106519), 2023-05-24
Supplement: bjsports-2022-106519supp001_data_supplement.pdf [file bjsports-2022-106519supp001_data_supplement.pdf]

**Supplemental File: Extra Web Material**

- 1. Medline-Ovid Search Strategy**
- 2. Downs and Black Quality Assessment Tool**
- 3. Study Characteristics**
- 4. Downs and Black Quality Assessment Tool Ratings**
- 5. Semi-quantitative Analyses**

## 1. Medline-Ovid Search Strategy

- 1 exp contraceptives, oral/ or exp contraceptives, oral, combined/ or exp contraceptives, oral, hormonal/ or exp contraceptives, oral, sequential/ or exp contraceptives, oral, synthetic/ (49877)  
Annotation: includes non mesh drug terms from each. Can review w/ Jerilynn
- 2 Hormonal Contraception/ (38)
- 3 ((combined or hormon\* or oral) adj3 contracep\*).mp. [mp=title, abstract, original title, name of substance word, subject heading word, floating sub-heading word, keyword heading word, organism supplementary concept word, protocol supplementary concept word, rare disease supplementary concept word, unique identifier, synonyms] (41640)
- 4 (birth control adj3 pill?).mp. [mp=title, abstract, original title, name of substance word, subject heading word, floating sub-heading word, keyword heading word, organism supplementary concept word, protocol supplementary concept word, rare disease supplementary concept word, unique identifier, synonyms] (562)
- 5 1 or 2 or 3 or 4 [CHC mesh and keyword] (62439)
- 6 "bone and bones"/ or exp "bones of lower extremity"/ or exp "bones of upper extremity"/ or epiphyses/ or growth plate/ or exp rib cage/ or exp skull/ or exp spine/ (599910)
- 7 Bone Diseases, Metabolic/ or bone demineralization, pathologic/ or decalcification, pathologic/ or osteoporosis/ or osteoporosis, postmenopausal/ or bone resorption/ or osteochondritis/ or osteochondritis dissecans/ or osteochondrosis/ or spinal osteochondrosis/ or spinal diseases/ or intervertebral disc degeneration/ or intervertebral disc displacement/ or "ossification of posterior longitudinal ligament"/ or spinal osteophytosis/ or osteoarthritis, spine/ or spondylosis/ or spondylolysis/ or spondylolisthesis/ or osteosclerosis/ or exp Fractures, Bone/ or heel spur/ or osteophyte/ or Bone Density/ (330498)
- 8 (((bone\* or hip or pelv\* or humer\* or femur or femoral or wrist or tibia\* or fibula\* or vertebr\*) adj3 (fracture\* or break\* or broken)) or bone demineralization or bone decalcification or osteoporos\* or bone resorption or osteochondr\* or disc degeneration or degenerative disc or disc displacement or heel spur or osteosclero\* or spondyl\* or osteoarthritis or osteopathy\* or ossification or disc displac\* or bone mass or bone loss or bone densit\* or bone mineral density or bone health).mp. [mp=title, abstract, original title, name of substance word, subject heading word, floating sub-heading word, keyword heading word, organism supplementary concept word, protocol supplementary concept word, rare disease supplementary concept word, unique identifier, synonyms] (482133)
- 9 6 or 7 or 8 [bone mesh and keywords] (967426)
- 10 tendons/ or achilles tendon/ or hamstring tendons/ or patellar ligament/ or rotator cuff/ (41967)
- 11 tendinopathy/ or elbow tendinopathy/ or tennis elbow/ or enthesopathy/ or tendon entrapment/ or de quervain disease/ or trigger finger disorder/ or tenosynovitis/ (11085)
- 12 (tendon\* or rotator cuff or patellar ligament\* or tendin\* or tenosynovitis or tennis elbow or enthesopathy or enthesitis or de quervain disease or trigger finger or epicondyl\*).mp. [mp=title, abstract, original title, name of substance word, subject heading word, floating sub-heading word, keyword heading word, organism supplementary concept word, protocol supplementary concept word, rare disease supplementary concept word, unique identifier, synonyms] (106729)
- 13 10 or 11 or 12 [tendon mesh and keyword] (106729)
- 14 exp Muscle, Skeletal/ or fascia/ or fascia lata/ (274584)
- 15 muscular diseases/ or anterior compartment syndrome/ or ischemic contracture/ or fibromyalgia/ or medial tibial stress syndrome/ or Sarcopenia/ or Fasciitis, Plantar/ or Iliotibial Band Syndrome/ (39386)
- 16 (muscl\* or muscl\* or fascia\* or rectus abdomin\* or paraspinal or deltoid or gracilis or hamstring\* or pectoral\* or psoas or iliopsoas or quadricep\* or tensor fascia lata or iliotibial band or it band or ITB or ITBS or compartment syndrome or contracture or medial tibial stress syndrome or MTSS or sarcopen\* or

fasciitis).mp. [mp=title, abstract, original title, name of substance word, subject heading word, floating sub-heading word, keyword heading word, organism supplementary concept word, protocol supplementary concept word, rare disease supplementary concept word, unique identifier, synonyms] (1004055)

17 14 or 15 or 16 [muscle and fascia mesh and keyword] (1045510)

18 exp joints/ or exp Fibrocartilage/ [all joints, synovial bursa, articular cartilage, articular ligaments or intervertebral discs, meniscus, tfcc, palmar plate, plantar plate] (259368)

19 joint diseases/ or osteoarthritis/ or osteoarthritis, hip/ or osteoarthritis, knee/ or osteoarthritis, spine/ or bursitis/ or peri-arthritis/ or contracture/ or hip contracture/ or femoracetabular impingement/ or hallux limitus/ or hallux rigidus/ or joint dislocations/ or diastasis, bone/ or pubic symphysis diastasis/ or exp fracture dislocation/ or hip dislocation/ or knee dislocation/ or patellar dislocation/ or shoulder dislocation/ or joint instability/ or joint loose bodies/ or patellofemoral pain syndrome/ or shoulder impingement syndrome/ or synovitis/ or temporomandibular joint disorders/ or temporomandibular joint dysfunction syndrome/ or cartilage diseases/ or chondromalacia patellae/ or osteochondritis/ (183144)

20 ((joint# adj3 (disloc\* or impinge\* or sublux\* or diastasis or instabil\* or loose bodies)) or temporomandibular joint or TMJ or cartilag\* or fibrocartilag\* or menisc\* or chondromalacia\* or osteochondritis or ligament\* or ACL or MCL or PCL or LCL or labrum or labral or articular or osteoarthritis or bursitis or peri-arthritis or impingement syndrome or hallux limitus or hallux rigidus or patellofemoral pain syndrome or PFPS or synovitis).mp. [mp=title, abstract, original title, name of substance word, subject heading word, floating sub-heading word, keyword heading word, organism supplementary concept word, protocol supplementary concept word, rare disease supplementary concept word, unique identifier, synonyms] (409560)

21 18 or 19 or 20 [joints, cartilage, and associated terms mesh and keyword] (554426)

22 9 or 13 or 17 or 21 [all msk injuries and conditions] (2237463)

23 5 and 22 [chc and all msk injuries and conditions] (2638)

**2. Downs and Black Quality Assessment Tool<sup>21</sup>**

| Category          | Item | Question                                                                                | Scoring                                               |
|-------------------|------|-----------------------------------------------------------------------------------------|-------------------------------------------------------|
| Reporting         | 1    | Is the hypothesis/aim clearly described?                                                | Yes (1), No (0)                                       |
|                   | 2    | Are the main outcomes clearly described?                                                | Yes (1), No (0)                                       |
|                   | 3    | Are the characteristics of patients included clearly described?                         | Yes (1), No (0)                                       |
|                   | 4    | Are interventions clearly described?                                                    | Yes (1), No (0)                                       |
|                   | 5    | Are the distributions of principal confounders clearly described?                       | Yes (2), Partially (1), No (0)                        |
|                   | 6    | Are the main findings clearly described?                                                | Yes (1), No (0)                                       |
|                   | 7    | Does the study provide estimates of random variability for main outcomes?               | Yes (1), No (0)                                       |
|                   | 8    | Have all important adverse events been reported?                                        | Yes (1), No (0)                                       |
|                   | 9    | Have the characteristics of participants lost to follow-up been described?              | Yes (1), No (0)                                       |
|                   | 10   | Have actual p-values been reported?                                                     | Yes (1), No (0)                                       |
| External Validity | 11   | Were participants representative of the entire population?                              | Yes (1), No/unclear (0)                               |
|                   | 12   | Were people prepared to participate representative of the entire population?            | Yes (1), No/unclear (0)                               |
|                   | 13   | Were staff/facilities used representative of the treatment majority of persons receive? | Yes (1), No/unclear (0)                               |
| Internal Validity | 14   | Were participants blinded to the intervention?                                          | Yes (1), No/unclear (0)                               |
|                   | 15   | Were assessors blinded to intervention group?                                           | Yes (1), No/unclear (0)                               |
|                   | 16   | Was data dredging made clear?                                                           | Yes (1), No/unclear (0)                               |
|                   | 17   | Were different follow up lengths adjusted for?                                          | Yes (1), No/unclear (0)                               |
|                   | 18   | Were statistical tests appropriate?                                                     | Yes (1), No/unclear (0)                               |
|                   | 19   | Was compliance measured reliably?                                                       | Yes (1), No/unclear (0)                               |
|                   | 20   | Were main outcomes valid and reliable?                                                  | Yes (1), No/unclear (0)                               |
|                   | 21   | Were participants recruited from the same population?                                   | Yes (1), No/unclear (0)                               |
|                   | 22   | Were participants recruited over the same time period?                                  | Yes (1), No/unclear (0)                               |
|                   | 23   | Were participants randomized?                                                           | Yes (1), No/unclear (0)                               |
|                   | 24   | Was random assignment concealed?                                                        | Yes (1), No/unclear (0)                               |
|                   | 25   | Was there adequate adjustment for confounding?                                          | Yes (1), No/unclear (0)                               |
|                   | 26   | Were losses to follow-up considered?                                                    | Yes (1), No/unclear (0)                               |
| Power             | 27   | Did the study have sufficient power?                                                    | ≤70% (0), 80% (1), 85% (2), 90% (3), 95% (4), 99% (5) |

## 3. Study Characteristics

| Author, year<br>(design,<br>country)        | Participants<br>n (Mean±SD, Median<br>(min-max), or Mean<br>(95%CI) age years)                                   | CHC<br>Intervention<br>method; compound<br>(dose µg)<br>Duration<br>(prior use)                                    | Comparison<br>Condition<br>(prior CHC<br>exposure) | Outcome<br>(method, unit)                 | Group Results                                                                                                                                                                                       | Between Group<br>Comparison                                                                                                                 | DB Score<br>(0-32) |
|---------------------------------------------|------------------------------------------------------------------------------------------------------------------|--------------------------------------------------------------------------------------------------------------------|----------------------------------------------------|-------------------------------------------|-----------------------------------------------------------------------------------------------------------------------------------------------------------------------------------------------------|---------------------------------------------------------------------------------------------------------------------------------------------|--------------------|
| Allaway,<br>2020<br>(Quasi, USA)            | Never user: n (8<br>(23.6±1.0))<br><br>Users: n (17)<br>CHC Oral: n (9 (22.3±1.3))<br>CHC Ring: n (8 (23.1±1.4)) | Oral; EE/DG<br>(30µg/150µg)<br>42-45 days<br>(0 days)<br><br>Ring; EE/DG<br>(15µg/120µg)<br>42-45 days<br>(0 days) | Never users<br>(0 days)                            | IGF-I<br>(serum) ng*d/mL                  | Mean pre-post<br>Baseline<br>Never user: 154.7 ± 36.0<br>CHC Oral: 173.3 ± 28.2<br>CHC Ring: 117.8 ± 11.5                                                                                           | NR                                                                                                                                          | 15                 |
|                                             |                                                                                                                  |                                                                                                                    |                                                    | P1NP (serum) ng/mL                        | During Intervention (50-87 days)<br>Never user: NR<br>CHC Oral: NR<br>CHC Ring: NR<br><br>Mean pre-post<br>Baseline:<br>Never user: 7.34 ± 2.15<br>CHC Oral: 11.93 ± 3.27<br>CHC Ring: 13.38 ± 4.97 | NR                                                                                                                                          |                    |
| Almstedt,<br>2020<br>(PC, USA)              | Never user: n (28<br>(19.3±.6))<br><br>Ongoing user: n (34<br>(19.2±.5))                                         | Oral; EE (20-35µg)<br>12 mo<br>(1.9 ± 1.4 yr)                                                                      | Never users<br>(no use in past<br>year)            | LBM (DXA) kg                              | Time point mean (baseline vs. 12-mo)<br>Never user: 39.9±4.6 vs. 40.1±4.5<br>Ongoing user: 42.0±4.6 vs. 42.5±4.4                                                                                    | NR                                                                                                                                          | 13                 |
|                                             |                                                                                                                  |                                                                                                                    |                                                    | CTX (serum) ng/ml                         | Time point mean (baseline vs. 6-mo)<br>Never user: 13.8±5.3 vs. 14.2±8.5<br>Ongoing user: 18.6±8.2 vs. 20.4 ± 0.3                                                                                   | p (0.018)                                                                                                                                   |                    |
|                                             |                                                                                                                  |                                                                                                                    |                                                    | WHOLE BODY BMD (DXA)<br>g/cm <sup>2</sup> | Time point mean (baseline vs. 12-mo)<br>Never user: 1.043±0.01 vs. 1.055±0.01<br>Ongoing user: 1.037±0.01 vs. 1.041±0.01                                                                            | NR                                                                                                                                          |                    |
| Barad,<br>2005<br>(PC, USA)                 | Never users: n (47,922<br>(65.9±6.9))<br><br>Previous Users: n<br>(33,025 (60.0±6.5))                            | Oral; NR (NR)<br><br>NR (NR)                                                                                       | NR                                                 | First fracture (self-report)              | Crude rate (per 1000 person-years)<br>Never user: 24<br>Previous user <5 years: 22<br>Previous ≥ 5 years: 20                                                                                        | Adjusted HR (95%CI)<br>Overall: 1.07 (1.01,1.15)<br><5 years: 1.09 (1.01,1.18)<br>5-10 years: 1.07 (.96,1.20)<br>≥10 years: 1.02 (.91,1.14) | 19                 |
| Beksinska,<br>2009<br>(PC, South<br>Africa) | Never user: n (96<br>(17.4±1.2))<br><br>New user: n (59<br>(17.8±1.0))                                           | Oral; estrogen (93%<br>used 30 and 40 µg)<br>Up to 5 years<br>(0 days)                                             | Never users<br>(0 days)                            | RADIUS BMD (DXA)<br>g/cm <sup>2</sup>     | Adjusted mean % change<br>Never user: 1.49 (1.25-1.72)<br>New user: 0.84 (0.39-1.28)                                                                                                                | p =0.01                                                                                                                                     | 17                 |

| Author, year (design, country) | Participants n (Mean±SD, Median (min-max), or Mean (95%CI) age years) | CHC Intervention method; compound (dose µg) Duration (prior use)                                     | Comparison Condition (prior CHC exposure) | Outcome (method, unit)                   | Group Results                                                                                                                                                                                                                                                                                               | Between Group Comparison                                                                                               | DB Score (0-32) |
|--------------------------------|-----------------------------------------------------------------------|------------------------------------------------------------------------------------------------------|-------------------------------------------|------------------------------------------|-------------------------------------------------------------------------------------------------------------------------------------------------------------------------------------------------------------------------------------------------------------------------------------------------------------|------------------------------------------------------------------------------------------------------------------------|-----------------|
| Berenson, 2004 (Quasi, USA)    | Never user: n (44 (25.5±4.3))                                         | CHC A: Oral EE/NO (0.035mg/1mg) 24 months (no use within 1 mo)                                       | Never users (NR)                          | LUMBAR SPINE BMD (DXA) g/cm <sup>2</sup> | Adjusted mean % change (baseline to 12-mo)<br>Never user: -0.44 (-2.06, 1.16)<br>CHC A: 2.12 (0.30, 3.93)<br>CHC B: 0.17 (-1.56, 1.90)                                                                                                                                                                      | NR                                                                                                                     | 20              |
|                                | CHC A: n (25 (26.1±3.9))<br>CHC B: n (42 (25.4±4.4))                  | CHC B: Oral EE/DG (0.030mg/ 0.15mg) 24 months (no use within 1 mo)                                   |                                           |                                          | Adjusted mean % change (baseline to 24-mo)<br>Never user: 1.80 (-0.33, 3.92)<br>CHC A: -1.53 (-3.80, 0.73)<br>CHC B: -2.57 (-4.63, -0.51)                                                                                                                                                                   | Mean % change (95%CI) difference<br>Never user vs CHC A: 0.67 (-1.54, 2.88)<br>Never user vs CHC B: 1.51 (-0.40, 3.42) |                 |
| Berenson, 2008 (PC, USA)       | Never user: n (51 (16-33))                                            | Oral; DG/EE2, placebo, EE2 (0.15mg/20µg 21 days, 2 days,10µg 5 days) 336 months (no use within 3 mo) | Never users (No use within 3 mo)          | LUMBAR SPINE BMD (DXA) g/cm <sup>2</sup> | Adjusted mean % change from baseline<br>6-mo: Never user: 0.51, New user: 0.18<br>12-mo: Never user: 0.91, New user: 0.20<br>18-mo: Never user: 1.33, New user: 0.08<br>24-mo: Never user: 1.66, New User: -0.01<br>30-mo: Never user: 1.93, New user: -0.19<br>36-mo: Never user: 1.94, New user: -0.54    | 6 mo p<.001<br>12 mo p<.001<br>18 mo p<.001<br>24 mo p<.001<br>30 mo p<.001<br>36 mo p<.001                            | 20              |
|                                | New user: n (77 (16-33))                                              |                                                                                                      |                                           | FEMORAL NECK BMD (DXA) g/cm <sup>2</sup> | Adjusted mean % change from baseline<br>6-mo: Never user: 0.05, New user: -0.22<br>12-mo: Never user: 0.15, New user: -0.30<br>18-mo: Never user: 0.29, New user: -0.54<br>24-mo: Never user: 0.54, New User: -0.76<br>30-mo: Never user: 0.66, New user: -1.00<br>36-mo: Never user: 0.61, New user: -1.29 | 6 mo p>.05<br>12 mo p<.05<br>18 mo p<.001<br>24 mo p<.001<br>30 mo p<.001<br>36 mo p<.001                              |                 |
| Biaison, 2015 (Quasi, Brazil)  | Never user: n (26 (15.6; 14.7-16.1))                                  | Oral; DG/EE (50µg/20µg) 12 months (0 days)                                                           | Never users (0 days)                      | LUMBAR SPINE BMD (DXA) g/cm <sup>2</sup> | Mean % change (baseline to 12-mo)<br>Never user: 12.16%<br>New user: 2.07%                                                                                                                                                                                                                                  | Mean difference in % changes<br>10.09%, p=0.056                                                                        | 15              |
|                                | New user: n (35 (15.8; 11.8-19.5))                                    |                                                                                                      |                                           | LUMBAR SPINE BMC(DXA) g                  | Mean % change (baseline to 12-mo)<br>Never user: 16.84%<br>New user: 1.57%                                                                                                                                                                                                                                  | Mean difference in % changes<br>15.27%, p=0.014                                                                        |                 |
|                                |                                                                       |                                                                                                      |                                           | WHOLE BODY BMD (DXA) g/cm <sup>2</sup>   | Mean % change (baseline to 12-mo)<br>Never user: 5.28%<br>New user: 0.84%                                                                                                                                                                                                                                   | Mean difference in % changes<br>4.44%, p=0.15                                                                          |                 |

| Author, year<br>(design,<br>country) | Participants<br>n (Mean±SD, Median<br>(min-max), or Mean<br>(95%CI) age years)          | CHC<br>Intervention<br>method; compound<br>(dose µg)<br>Duration<br>(prior use)                | Comparison<br>Condition<br>(prior CHC<br>exposure) | Outcome<br>(method, unit)                   | Group Results                                                                                   | Between Group<br>Comparison                                     | DB Score<br>(0-32) |
|--------------------------------------|-----------------------------------------------------------------------------------------|------------------------------------------------------------------------------------------------|----------------------------------------------------|---------------------------------------------|-------------------------------------------------------------------------------------------------|-----------------------------------------------------------------|--------------------|
| Bonny, 2009<br>(Quasi, USA)          | Never user: n (18<br>(15.7±1.8)<br>New user: n (18<br>(15.6±1.6)                        | Oral; NR (NR)<br>(no use for 3-<br>months)                                                     | Never users<br>(no use for 3-<br>months)           | WHOLE BODY BMC (DXA)<br>g                   | Mean % change (baseline to 12-mo)<br>Never user: 11.34%<br>New user: 1.22%                      | Mean difference in %<br>changes<br>10.12%, p (0.031)            | 14                 |
|                                      |                                                                                         |                                                                                                |                                                    | SUBTOTAL BMD (DXA)<br>g/cm <sup>2</sup>     | Mean % change (baseline to 12-mo)<br>Never user: 5.28%<br>New user: 0.56%                       | Mean difference in %<br>changes<br>4.72%, p (0.15)              |                    |
|                                      |                                                                                         |                                                                                                |                                                    | SUBTOTAL BMC (DXA) g                        | Mean % change (baseline to 12-mo)<br>Never user: 16.04%<br>New user: 1.18%                      | Mean difference in %<br>changes<br>14.86%, p (0.033)            |                    |
|                                      |                                                                                         |                                                                                                |                                                    | LBM (DXA) kg                                | Mean % change (baseline to 6-mo)<br>Never users: 0.6% ± 3.4%<br>New users: 0.6% ± 4.7%          | p=0.07                                                          |                    |
|                                      |                                                                                         |                                                                                                |                                                    | LUMBAR SPINE BMD<br>(DXA) g/cm <sup>2</sup> | NR                                                                                              | Mean difference in change<br>(95% CI)<br>0.002 (-0.104, 0.091)  |                    |
| Brajic, 2018<br>(PC, Canada)         | Never user: n (78 (18.5<br>[18.0, 19.1])<br>Ongoing user: n (229<br>(19.8 [9.5, 20.2])) | Oral, Ring; estrogen<br>(avg 26.5µg/day,<br>range 15-35)<br>(mean age of starting<br>CHC 17.5) | Never users<br>(0-days)                            | FEMORAL NECK BMD<br>(DXA) g/cm <sup>2</sup> | NR                                                                                              | Mean difference in change<br>(95% CI)<br>-0.001 (-0.010, 0.008) | 18                 |
|                                      |                                                                                         |                                                                                                |                                                    | TOTAL HIP BMD (DXA)<br>g/cm <sup>2</sup>    | NR                                                                                              | Mean difference in change<br>(95% CI)<br>-0.001 (-0.009, 0.006) |                    |
|                                      |                                                                                         |                                                                                                |                                                    | LUMBAR SPINE BMD<br>(DXA) g/cm <sup>2</sup> | Adjusted mean at 7 years<br>Black<br>Never user: 1.12 ± 0.11<br>Past user: 1.12 ± 0.13<br>White | Beta (± SE, R <sup>2</sup> )<br>-0.000005 ± 0.0002, 0%          |                    |
| Cobb, 2002<br>(RC, USA)              | Black<br>never user: n (56<br>(31.2±4.0)<br>past user: n (204<br>(31.5±3.6)<br>White    | Oral; EE(37.3 ± 11.5<br>µg)<br>N/A<br>4.1 (IQR 7.1) years                                      | Never users<br>4.1 (IQR 7.1)<br>years              | LUMBAR SPINE BMD<br>(DXA) g/cm <sup>2</sup> | Adjusted mean at 7 years<br>Black<br>Never user: 1.12 ± 0.11<br>Past user: 1.12 ± 0.13<br>White | Beta (± SE, R <sup>2</sup> )<br>-0.000005 ± 0.0002, 0%          | 16                 |

| Author, year<br>(design,<br>country) | Participants<br>n (Mean±SD, Median<br>(min-max), or Mean<br>(95%CI) age years) | CHC<br>Intervention<br>method; compound<br>(dose µg)<br>Duration<br>(prior use) | Comparison<br>Condition<br>(prior CHC<br>exposure) | Outcome<br>(method, unit)                   | Group Results                                                                                                                                                                                                                                                                                                | Between Group<br>Comparison                                                       | DB Score<br>(0-32) |
|--------------------------------------|--------------------------------------------------------------------------------|---------------------------------------------------------------------------------|----------------------------------------------------|---------------------------------------------|--------------------------------------------------------------------------------------------------------------------------------------------------------------------------------------------------------------------------------------------------------------------------------------------------------------|-----------------------------------------------------------------------------------|--------------------|
|                                      | never user: n (60<br>(33.2±3.3)<br>past user: n (156<br>(32.4±3.7)             |                                                                                 |                                                    |                                             | Never user: 1.06 ± 0.11<br>Past user: 1.04 ± 0.12                                                                                                                                                                                                                                                            |                                                                                   |                    |
|                                      |                                                                                |                                                                                 |                                                    | WHOLE BODY BMD (DXA)<br>g/cm <sup>2</sup>   | Adjusted mean at 7 years<br>Black<br>Never user: 1.16 ± 0.09<br>Past user: 1.16 ± 0.10<br>White<br>Never user: 1.08 ± 0.07<br>Past user: 1.10 ± 0.08<br>Adjusted mean at 7 years<br>Black<br>Never user: 1.03 ± 0.12<br>Past user: 1.04 ± 0.14<br>White<br>Never user: 0.94 ± 0.11<br>Past user: 0.98 ± 0.11 | Beta (± SE, R <sup>2</sup> )<br>-0.000054 ± 0.00012, 0.1%                         |                    |
|                                      |                                                                                |                                                                                 |                                                    | TOTAL HIP BMD (DXA)<br>g/cm <sup>2</sup>    | Adjusted mean at 7 years<br>Black<br>Never user: 1.03 ± 0.12<br>Past user: 1.04 ± 0.14<br>White<br>Never user: 0.94 ± 0.11<br>Past user: 0.98 ± 0.11                                                                                                                                                         | Beta (± SE, R <sup>2</sup> )<br>-0.000012 ± 0.0002, 0%                            |                    |
|                                      |                                                                                |                                                                                 |                                                    | LBM (DXA) kg                                | Never user: 44.6 ± 7.1<br>Past user: 44.4 ± 6.0<br>White<br>Never user: 42.8 ± 5.4<br>Past user: 42.6 ± 4.6                                                                                                                                                                                                  | NR                                                                                |                    |
|                                      |                                                                                |                                                                                 |                                                    | WHOLE BODY BMC (DXA)<br>g                   | Yearly rate of change<br>Eumenorrhoeic<br>Never user: 3.7 ± 3.4<br>New user: 9.9 ± 3.9                                                                                                                                                                                                                       | Difference in mean yearly<br>change rate (± SE)<br>Eumenorrhoeic<br>6.2±5.2       |                    |
| Cobb, 2007<br>(RCT, USA)             | Never user: n (81<br>(21.9±2.6)<br>New user: n (69<br>(22.3±2.7)               | Oral; EE/NG (30 µg/<br>0.3mg)<br>2 years<br>(no use for 6-<br>months)           | Never users<br>(no use for 6-<br>months)           | LUMBAR SPINE BMD<br>(DXA) g/cm <sup>2</sup> | Yearly rate of change<br>Eumenorrhoeic<br>Never user: 0.0002 ± 0.0016<br>New user: 0.0022 ± 0.0019                                                                                                                                                                                                           | Difference in mean yearly<br>change rate (± SE)<br>Eumenorrhoeic<br>0.0020±0.0025 | 21                 |
|                                      |                                                                                |                                                                                 |                                                    | TOTAL HIP BMD (DXA)<br>g/cm <sup>2</sup>    | Yearly rate of change<br>Eumenorrhoeic<br>Never user: -0.0023 ± 0.0015<br>New user: 0.0013 ± 0.0017                                                                                                                                                                                                          | Difference in mean yearly<br>change rate (± SE)<br>Eumenorrhoeic<br>0.0035±0.0022 |                    |



| Author, year<br>(design,<br>country) | Participants<br>n (Mean±SD, Median<br>(min-max), or Mean<br>(95%CI) age years) | CHC<br>Intervention<br>method; compound<br>(dose µg)<br>Duration<br>(prior use)                                                                     | Comparison<br>Condition<br>(prior CHC<br>exposure) | Outcome<br>(method, unit)                             | Group Results                                                                                                                                                                                                                                 | Between Group<br>Comparison                                                                             | DB Score<br>(0-32) |
|--------------------------------------|--------------------------------------------------------------------------------|-----------------------------------------------------------------------------------------------------------------------------------------------------|----------------------------------------------------|-------------------------------------------------------|-----------------------------------------------------------------------------------------------------------------------------------------------------------------------------------------------------------------------------------------------|---------------------------------------------------------------------------------------------------------|--------------------|
| Cooper, 1993<br>(PC, UK)             | n (NR (29))                                                                    | Oral; NR (NR)<br>3.7 years<br>(NR)                                                                                                                  | Never users<br>(0 days)                            | stress fracture<br>(questionnaire)                    | Incidence rate per 100 women-years<br>Never users: 9.2<br>New user: 5.8                                                                                                                                                                       | HR (95%CI)<br>0.57 (0.18, 1.83)                                                                         | 18                 |
|                                      |                                                                                |                                                                                                                                                     |                                                    | Any Fracture (national<br>database)                   | Incidence rate per 1000 women-years<br>Never user: 2.6<br>Ongoing user: 2.99                                                                                                                                                                  | Adjusted RR (95%CI)<br>1.20 (1.08,1.34)                                                                 |                    |
|                                      |                                                                                |                                                                                                                                                     |                                                    | Forearm Fracture<br>(national database)               | Incidence rate per 1000 women-years<br>Never user: 0.67<br>Ongoing user: 0.66                                                                                                                                                                 | Adjusted RR (95%CI)<br>1.06 (0.95,1.32)                                                                 |                    |
| Cromer, 2008<br>(PC, USA)            | Never user: n (95<br>(14.8±1.9)<br>New user: n (62<br>(16.0±1.4)               | Oral; EE/LNG<br>(20µg/100µg)<br>2 years<br>(no use for 3 months)                                                                                    | Never users<br>(no use for 3<br>months)            | LUMBAR SPINE BMD<br>(DXA) g/cm <sup>2</sup>           | Adjusted mean (baseline vs. 6-mon vs. 12-<br>mon vs. 18-mon vs. 24-mon)<br>Never user: 0.98±0.01 vs. 1.00±0.01 vs.<br>1.02±0.01 vs. 1.03±0.01 vs. 1.04±0.01<br>New user: 1.01±0.01 vs. 1.02±0.01 vs.<br>1.03±0.01 vs. 1.03±0.01 vs. 1.03±0.01 | Adjusted % Change (± SE),<br>from baseline to 24 mo<br>Never user: 6.3% ± 0.5%<br>New user: 4.2% ± 0.7% | 17                 |
|                                      |                                                                                |                                                                                                                                                     |                                                    | FEMORAL NECK BMD<br>(DXA) g/cm <sup>2</sup>           | Adjusted mean (baseline vs. 6-mon vs. 12-<br>mon vs. 18-mon vs. 24-mon)<br>Never user: 0.92±0.01 vs. 0.93±0.01 vs.<br>0.94±0.01 vs. 0.95±0.01 vs. 0.96±0.01<br>New user: 0.96±0.01 vs. 0.96±0.01 vs.<br>0.96±0.01 vs. 0.97±0.01 vs. 0.97±0.01 | Adjusted % Change (± SE),<br>from baseline to 24 mo<br>Never user: 3.8% ± 0.8%<br>New user: 3.0% ± 1.0% |                    |
| Dalgaard,<br>2019<br>(PC, DEN)       | Never user: n (14 (24±1)<br>Ongoing user: n (14<br>(24±1)                      | Oral; n (7 EE/GD<br>(30µg/75µg)<br>Oral; n (5 EE/GD<br>(20µg/75µg)<br>Oral; n (2 EE/DGn<br>(20µg/150µg)<br>10 weeks<br>(6.1 ± 5 years prior<br>use) | Never users<br>(NR)                                | Quadriceps CSA (MRI)<br>mm <sup>2</sup>               | Mean % change (baseline to 10-weeks)<br>Never user: 7.9% ± 0.1%<br>Ongoing user: 10.8% ± 1.3%                                                                                                                                                 | Group-by-time interaction<br>p=0.06                                                                     | 15                 |
|                                      |                                                                                |                                                                                                                                                     |                                                    | Quadriceps Fiber Type<br>CSA (Biopsy) µm <sup>2</sup> | Mean pre-post (baseline vs. 10-weeks)<br>Type I<br>Never user: 4020±348 vs. 3777±354<br>Ongoing user: 3821±197 vs. 4490±313<br>Type II<br>Never user: 3239±344 vs. 3691±361<br>Ongoing user: 3452±242 vs. 3891±387                            | Group-by-time interaction<br>p=0.98                                                                     |                    |

| Author, year<br>(design,<br>country) | Participants<br>n (Mean±SD, Median<br>(min-max), or Mean<br>(95%CI) age years) | CHC<br>Intervention<br>method; compound<br>(dose µg)<br>Duration<br>(prior use) | Comparison<br>Condition<br>(prior CHC<br>exposure) | Outcome<br>(method, unit)                                          | Group Results                                                                                                                                                                                                                                                                                                                                                                                                                                                                                                                                                                                        | Between Group<br>Comparison                                                                                 | DB Score<br>(0-32) |
|--------------------------------------|--------------------------------------------------------------------------------|---------------------------------------------------------------------------------|----------------------------------------------------|--------------------------------------------------------------------|------------------------------------------------------------------------------------------------------------------------------------------------------------------------------------------------------------------------------------------------------------------------------------------------------------------------------------------------------------------------------------------------------------------------------------------------------------------------------------------------------------------------------------------------------------------------------------------------------|-------------------------------------------------------------------------------------------------------------|--------------------|
|                                      |                                                                                |                                                                                 |                                                    |                                                                    | Mean pre-post (baseline vs. 10 weeks)<br>Type I<br>Never user: 53.4%±2.7% vs. 52.4%±2.9%<br>Ongoing user: 46.9%±2.8% vs. 48.3%±2.5%                                                                                                                                                                                                                                                                                                                                                                                                                                                                  |                                                                                                             |                    |
|                                      |                                                                                |                                                                                 |                                                    | Fiber type composition<br>(biopsy) %                               | Type Iia<br>Never user: 39.4%±2.6% vs. 42.8%±2.1%<br>Ongoing user: 42.6%±2.5% vs. 47.7%±2.5%                                                                                                                                                                                                                                                                                                                                                                                                                                                                                                         | Group-by-time interaction<br>Type I: p=0.52<br>Type Iia: p=0.64<br>Type Iix: p=0.05                         |                    |
|                                      |                                                                                |                                                                                 |                                                    | tendon CSA (MRI) mm <sup>2</sup>                                   | Type Iix<br>Never user: 7.1%±2.1% vs. 4.8%±1.2%<br>Ongoing user: 10.5%±2.2% vs. 3.9%±1.5%<br>Mean pre-post (baseline vs. 10 weeks)<br>Proximal<br>Never user: 77±3 vs. 85±5<br>Ongoing user: 81±6 vs. 87±5<br>Middle<br>Never user: 80±3 vs. 97±7<br>Ongoing user: 78±4 vs. 90±4<br>Distal<br>Never user: 100±5 vs. 109±5<br>Ongoing user: 95±5 vs. 101±5                                                                                                                                                                                                                                            | Group-by-time interaction<br>proximal: p=0.70<br>middle: p=0.57<br>distal: p=0.57                           |                    |
|                                      |                                                                                |                                                                                 |                                                    | tendon collagen<br>concentration (biopsy)<br>mg/mg d.w; dry weight | Mean pre-post (baseline vs. 10 weeks)<br>Never user: 0.61±0.03 vs. 0.62±0.04<br>Ongoing user: 0.62±0.02 vs. 0.64±0.02                                                                                                                                                                                                                                                                                                                                                                                                                                                                                | Group-by-time interaction<br>p=0.72                                                                         |                    |
|                                      |                                                                                |                                                                                 |                                                    | tendon collagen cross-<br>linking (biopsy)<br>pmol/pmol            | Mean pre-post<br>Baseline<br>Collagen concentration 0.62±0.02<br>Hydroxylysyl pyridinoline/Collagen 0.73±0.06<br>Lysyl pyridinoline/Collagen 0.03±0.02<br>Pentosidine/Collagen 0.012±0.001<br>10 weeks<br>Collagen concentration 0.64/0.02<br>Hydroxylysyl pyridinoline/Collagen 0.80±0.05<br>Lysyl pyridinoline/Collagen 0.03±0.00<br>Pentosidine/Collagen 0.012±0.001<br>Baseline<br>Collagen concentration 0.61±0.03<br>Hydroxylysyl pyridinoline/Collagen 0.63±0.06<br>Lysyl pyridinoline/Collagen 0.04±0.01<br>Pentosidine/Collagen 0.011±0.001<br>10 weeks<br>Collagen concentration 0.62±0.04 | Group-by-time interaction<br>HP/Collagen: p=0.56<br>LyP/Collagen: p=0.13<br>Pentosidine/Collagen:<br>p=0.44 |                    |

| Author, year<br>(design,<br>country) | Participants<br>n (Mean±SD, Median<br>(min-max), or Mean<br>(95%CI) age years) | CHC<br>Intervention<br>method; compound<br>(dose µg)<br>Duration<br>(prior use) | Comparison<br>Condition<br>(prior CHC<br>exposure) | Outcome<br>(method, unit)                                                     | Group Results                                                                                                                                                                                                   | Between Group<br>Comparison | DB Score<br>(0-32) |
|--------------------------------------|--------------------------------------------------------------------------------|---------------------------------------------------------------------------------|----------------------------------------------------|-------------------------------------------------------------------------------|-----------------------------------------------------------------------------------------------------------------------------------------------------------------------------------------------------------------|-----------------------------|--------------------|
|                                      |                                                                                |                                                                                 |                                                    |                                                                               | Hydroxylysyl pyridinoline/Collagen 0.65±0.06<br>Lysyl pyridinoline/Collagen 0.03±0.00<br>Pentosidine/Collagen 0.012±0.001                                                                                       |                             |                    |
|                                      |                                                                                |                                                                                 |                                                    | Quadriceps CSA (MRI) at<br>10 cm above lateral<br>epicondyle, cm <sup>2</sup> | Mean pre-post (baseline vs. 10 weeks)<br>Never user 33.1±4.2 vs. 36.3±5.2<br>Ongoing user 35.7±4.7 vs. 39.4±5.5                                                                                                 | p=0.46                      |                    |
|                                      |                                                                                |                                                                                 |                                                    | Quadriceps CSA (MRI) at<br>20 cm above lateral<br>epicondyle, cm <sup>2</sup> | Mean % change (baseline vs. 10 weeks)<br>Never user 9.7±4.9%<br>Ongoing user 10.6±4.8%<br>Mean pre-post (baseline vs. 10 weeks)<br>Never user: 54.5±5.2 vs. 59.5±5.6<br>Ongoing user: 54.4±9.5 vs. 59.6±10.3    | p=0.81                      |                    |
|                                      |                                                                                |                                                                                 |                                                    | Quadriceps CSA (MRI) at<br>30 cm above lateral<br>epicondyle, cm <sup>2</sup> | Mean pre-post (baseline vs. 10 weeks)<br>Never user: 9.2 ± 5.0%<br>Ongoing user: 9.5 ± 6.0%<br>Mean pre-post (baseline vs. 10 weeks)<br>Never user: 53.7±7.8 vs. 58.6±7.5<br>Ongoing user: 52.1±9.1 vs. 57.8±10 | p=0.37                      |                    |
| Dalgaard,<br>2020<br>(PC, DEN)       | Never user: n (18<br>(24.3±2.5)<br>Ongoing user: n (20<br>(24.2±2.0)           | Oral; EE(30-35µg)<br>10 weeks<br>(6.5 ± 2.5 yrs prior<br>use)                   | Never users<br>(0 yrs)                             | Quadriceps Type I CSA<br>(biopsy), µm <sup>2</sup>                            | Mean % change (baseline vs. 10 weeks)<br>Never user: 6.4 ± 7.4%<br>Ongoing user: 8.8 ± 7.6%                                                                                                                     | NS                          |                    |
|                                      |                                                                                |                                                                                 |                                                    | Quadriceps Type II CSA<br>(biopsy), µm <sup>2</sup>                           | Mean % change (baseline vs. 10 weeks)<br>Never user: 16.6 ± 7.2%<br>Ongoing user: 19.9 ± 7.9%                                                                                                                   | NS                          |                    |
|                                      |                                                                                |                                                                                 |                                                    | LBM (DXA) kg                                                                  | Mean pre-post<br>Baseline<br>Never user: 43.9±5.0<br>Ongoing user: 42.9±5.0<br><br>10 weeks<br>Never user: 45.1±5.0<br>Ongoing user: 44.6±5.0                                                                   | p=0.08                      | 16                 |

| Author, year<br>(design,<br>country) | Participants<br>n (Mean±SD, Median<br>(min-max), or Mean<br>(95%CI) age years)                                                  | CHC<br>Intervention<br>method; compound<br>(dose µg)<br>Duration<br>(prior use)                  | Comparison<br>Condition<br>(prior CHC<br>exposure) | Outcome<br>(method, unit)                   | Group Results                                                                                                                                                                                                                                                                                                             | Between Group<br>Comparison                                                                                                                                                                                 | DB Score<br>(0-32) |
|--------------------------------------|---------------------------------------------------------------------------------------------------------------------------------|--------------------------------------------------------------------------------------------------|----------------------------------------------------|---------------------------------------------|---------------------------------------------------------------------------------------------------------------------------------------------------------------------------------------------------------------------------------------------------------------------------------------------------------------------------|-------------------------------------------------------------------------------------------------------------------------------------------------------------------------------------------------------------|--------------------|
| Elgan, 2003<br>(RC, Sweden)          | CHC-nonsmoker: n (35<br>(18-26)<br>CHC-smoker: n (9 (18-26)<br>CHC+nonsmoker: n (57<br>(18-26)<br>CHC+smoker: n (17 (18-<br>26) | Oral; NR(NR)<br>Users: 2 yrs<br>(4.3 ± 2.3 yrs)                                                  | Never users<br>(NR)                                | Calcaneus BMD (DXA)<br>g/cm <sup>2</sup>    | Mean change<br>CHC-nonsmoker: 0.0048±0.0312<br>CHC-smoker: -0.0330±0.0300<br>CHC+nonsmoker: -0.0069±0.0365<br>CHC+smoker: -0.0116±0.0428                                                                                                                                                                                  | Multivariable linear<br>regression (CHC -<br>nonsmoker is reference, ±<br>SE)<br>CHC-smoker: -0.03 ± 0.01,<br>p (0.02)<br>CHC+nonsmoker: -0.01 ±<br>0.01, p (0.07)<br>CHC+smoker: -0.02 ± 0.01,<br>p (0.01) | 14                 |
|                                      |                                                                                                                                 |                                                                                                  |                                                    | D-PYD (urine) nmol/L                        | Mean change<br>CHC-nonsmoker: 0.5394±2.8025<br>CHC-smoker: -2.0000±2.8000<br>CHC+nonsmoker: -0.3679±1.7303<br>CHC+smoker: -0.5286±2.2812                                                                                                                                                                                  | Multivariable linear<br>regression (CHC -<br>nonsmoker is reference)<br>CHC-smoker: -3.26 ± 0.92,<br>p (0.001)<br>CHC+nonsmoker: -1.50 ±<br>0.49, p (0.003)<br>CHC+smoker: -1.72 ± 0.74,<br>p (0.022)       |                    |
| Elgan, 2004<br>(RC, Sweden)          | n (72 (21.5±2.2)                                                                                                                | Oral; NR(NR)<br>NR<br>(NR)                                                                       | Never users<br>(NR)                                | Calcaneus BMD (DXA)<br>g/cm <sup>2</sup>    | NR                                                                                                                                                                                                                                                                                                                        | OR (95%CI) ≥5% BMD loss<br>vs. ≥5% BMD gain<br>6.3 (1.6,25.7)                                                                                                                                               | 14                 |
| Gai, 2012<br>(Quasi,<br>China)       | Never user: n (115<br>(17.13±0.78)<br>CHC A: n (127 (17.1±0.8)<br>CHC B: n (134 (17.1±0.8)                                      | CHC A: Oral; EE/DG<br>(30µg/0.15mg)<br>CHC B: Oral; EE/CA<br>(35µg/2mg)<br>24-months<br>(0 days) | Never users<br>(0 days)                            | Lumbar spine BMD<br>(DXA) g/cm <sup>2</sup> | Mean pre-post (baseline vs. 12-mo vs. 24-mo)<br>Never user: 1.01±0.11 vs. 1.02±0.11 vs.<br>1.03±0.11<br>CHC A: 1.01±0.11 vs. 1.01±0.11 vs. 1.01±0.11<br>CHC B: 1.01±0.11 vs. 1.01±0.11 vs. 1.01±0.11                                                                                                                      | Baseline: p=0.99<br>12-mo: p=0.75<br>24-mo: p=0.34                                                                                                                                                          | 15                 |
|                                      |                                                                                                                                 |                                                                                                  |                                                    | Femoral neck BMD<br>(DXA) g/cm <sup>2</sup> | Mean % change (baseline vs. 24-mo)<br>Never user: 1.88%<br>CHC A: -0.30%<br>CHC B: 0.30%<br>Mean pre-post (baseline vs. 12-mo vs. 24- mo)<br>Never user: 0.82 ± 0.09 vs. 0.82 ± 0.09 vs. 0.82<br>± 0.09<br>CHC A: 0.82 ± 0.09 vs. 0.82 ± 0.09 vs. 0.81 ±<br>0.09<br>CHC B: 0.82 ± 0.09 vs. 0.82 ± 0.09 vs. 0.82 ±<br>0.09 | Baseline: p=0.97<br>12-mo: p=0.93<br>24-mo: p=0.56                                                                                                                                                          |                    |
|                                      |                                                                                                                                 |                                                                                                  |                                                    |                                             | Mean % change (baseline vs. 24-mo)<br>Never user: 0.98%<br>CHC A: -0.61%<br>CHC B: 0.49%                                                                                                                                                                                                                                  |                                                                                                                                                                                                             |                    |

| Author, year (design, country) | Participants n (Mean±SD, Median (min-max), or Mean (95%CI) age years)                     | CHC Intervention method; compound (dose µg) Duration (prior use)                                                              | Comparison Condition (prior CHC exposure) | Outcome (method, unit)                   | Group Results                                                                                                                                       | Between Group Comparison                                                                                                       | DB Score (0-32) |
|--------------------------------|-------------------------------------------------------------------------------------------|-------------------------------------------------------------------------------------------------------------------------------|-------------------------------------------|------------------------------------------|-----------------------------------------------------------------------------------------------------------------------------------------------------|--------------------------------------------------------------------------------------------------------------------------------|-----------------|
| Gargano, 2008 (Quasi, Italy)   | Never user: n (20 (25.7±6.4))<br>CHC A: n (20 (26.1±4.9))<br>CHC B: n (21 (28.1±3.7))     | CHC A: Oral; EE/DP (30µg/3mg)<br>CHC B: Oral; EE/DP (20µg/3mg)<br>12-months (NR)                                              | Never users (NR)                          | LUMBAR SPINE BMD (DXA) g/cm <sup>2</sup> | Mean pre-post (baseline vs. 12-mo)<br>Never user: 1.041±0.08 vs. 1.042±0.02<br>CHC A: 1.040±0.06 vs. 1.041±0.11<br>CHC B: 1.042±0.17 vs. 1.040±0.19 | NS                                                                                                                             | 13              |
|                                |                                                                                           |                                                                                                                               |                                           | BGP (serum)                              | NR                                                                                                                                                  | NR                                                                                                                             |                 |
|                                |                                                                                           |                                                                                                                               |                                           | PYD (urine)                              | NR                                                                                                                                                  | NR                                                                                                                             |                 |
|                                |                                                                                           |                                                                                                                               |                                           | D-PYD (urine)                            | NR                                                                                                                                                  | NR                                                                                                                             |                 |
| Gersten, 2016 (Quasi, USA)     | Never user: n (372 (14.8±1.72))<br>CHC A: n (247 (16±1.61))<br>CHC B: n (240 (15.9±1.71)) | CHC A: Oral; 84 days EE/LNG (30µg/150µg), then 7 days EE (10µg)<br>CHC B: Oral; 21 days EE/LNG (20µg/100µg)<br>12-months (NR) | Never users (NR)                          | LUMBAR SPINE BMD (DXA) g/cm <sup>2</sup> | Mean % change (baseline to 12-mo)<br>Never user: 2.50±0.14%<br>CHC A: 2.26±0.17%<br>CHC B: 1.45±0.17%                                               | Mean difference in % Change (95%CI)<br>Never user vs. CHC A: 0.23 (-0.20, 0.67)<br>Never user vs. CHC B: 1.05 (0.61, 1.49)     | 23              |
|                                |                                                                                           |                                                                                                                               |                                           | LUMBAR SPINE BMC (DXA) g                 | Mean % change (baseline to 12-mo)<br>Never user: 3.80±0.19 %<br>CHC A: 3.53±0.23 %<br>CHC B: 2.34±0.24%                                             | Mean difference in % Change (95%CI)<br>Never user vs. CHC A: 0.27 (-0.33, 0.87)<br>never user vs. CHC B: 1.45 (0.85, 2.06)     |                 |
|                                |                                                                                           |                                                                                                                               |                                           | FEMORAL NECK BMD (DXA) g/cm <sup>2</sup> | Mean % change (baseline to 12-mo)<br>Never user: 1.12±0.13%<br>CHC A: 1.77±0.15%<br>CHC B: 1.80±0.16%                                               | Mean difference in % Change (95%CI)<br>Never user vs. CHC A: -0.65 (-1.05, -0.25)<br>Never user vs. CHC B: -0.32 (-0.09, 0.72) |                 |
|                                |                                                                                           |                                                                                                                               |                                           | FEMORAL NECK BMC (DXA) g                 | Mean % change (baseline to 12-mo)<br>Never user: 1.51±0.18%<br>CHC A: 1.99±0.22%<br>CHC B: 1.02±0.23                                                | Mean difference in % Change (95%CI)<br>Never user vs. CHC A: -0.48 (-1.05, 0.09)<br>Never user vs. CHC B: 0.49 (-0.09, 1.07)   |                 |

| Author, year<br>(design,<br>country)               | Participants<br>n (Mean±SD, Median<br>(min-max), or Mean<br>(95%CI) age years) | CHC<br>Intervention<br>method; compound<br>(dose µg)<br>Duration<br>(prior use) | Comparison<br>Condition<br>(prior CHC<br>exposure) | Outcome<br>(method, unit)                      | Group Results                                                                                         | Between Group<br>Comparison                                                                                                         | DB Score<br>(0-32) |
|----------------------------------------------------|--------------------------------------------------------------------------------|---------------------------------------------------------------------------------|----------------------------------------------------|------------------------------------------------|-------------------------------------------------------------------------------------------------------|-------------------------------------------------------------------------------------------------------------------------------------|--------------------|
| Hansen, 1991<br>(PC, DEN)                          | Never user: n (90 (51±2))<br>Previous user: n (31<br>(51±2))                   | Oral; NR(NR)<br>12-years<br>(36±36mo)                                           | Never user<br>(NR)                                 | WHOLE BODY BMD (DXA)<br>g/cm <sup>2</sup>      | Mean % change (baseline to 12-mo)<br>Never user: 1.75±0.14%<br>CHC A: 1.32±0.14%<br>CHC B: 1.35±0.14% | Mean difference in %<br>Change (95%CI)<br>Never user vs. CHC A: 0.43<br>(0.03, 0.82)<br>Never user vs. CHC B: 0.40<br>(0.01, 0.80)  | 10                 |
|                                                    |                                                                                |                                                                                 |                                                    | WHOLE BODY BMC (DXA)<br>g                      | Mean % change (baseline to 12-mo)<br>Never user: 3.84±0.33%<br>CHC A: 3.31±0.35%<br>CHC B: 2.83±0.35% | Mean difference in %<br>Change (95%CI)<br>Never user vs. CHC A: 0.53<br>(-0.43, 1.48)<br>Never user vs. CHC B: 1.01<br>(0.05, 1.96) |                    |
|                                                    |                                                                                |                                                                                 |                                                    | LUMBAR SPINE BMD<br>(DXA) g/cm <sup>2</sup>    | Mean value (12 years after baseline)<br>Never user: 0.88 ± 0.16<br>Previous user: 0.85 ± 0.14         | NS                                                                                                                                  |                    |
|                                                    |                                                                                |                                                                                 |                                                    | FEMORAL NECK BMD<br>(DXA) g/cm <sup>2</sup>    | Mean value (12 years after baseline)<br>Never user: 0.68 ± 0.10<br>Previous user: 0.64 ± 0.09         | NS                                                                                                                                  |                    |
|                                                    |                                                                                |                                                                                 |                                                    | TROCHANTER BMD (DXA)<br>g/cm <sup>2</sup>      | Mean value (12 years after baseline)<br>Never user: 0.59 ± 0.10<br>Previous user: 0.59 ± 0.09         | NS                                                                                                                                  |                    |
|                                                    |                                                                                |                                                                                 |                                                    | WARD'S TRIANGLE BMD<br>(DXA) g/cm <sup>2</sup> | Mean value (12 years after baseline)<br>Never user: 0.48 ± 0.10<br>Previous user: 0.43 ± 0.09         | p < 0.05                                                                                                                            |                    |
|                                                    |                                                                                |                                                                                 |                                                    | RADIUS BMC (SPA)                               | Mean value (12 years after baseline)<br>Never user: 30.9 ± 5.9<br>Previous user: 31.8 ± 5.9           | NS                                                                                                                                  |                    |
| RADIUS BMC early<br>postmenopausal change<br>(SPA) | Mean change<br>Never user: -1.7 ± 1.9%<br>Previous user: -2.3 ± 1.9%           | NS                                                                              |                                                    |                                                |                                                                                                       |                                                                                                                                     |                    |

| Author, year<br>(design,<br>country) | Participants<br>n (Mean±SD, Median<br>(min-max), or Mean<br>(95%CI) age years)         | CHC<br>Intervention<br>method; compound<br>(dose µg)<br>Duration<br>(prior use)                                                                         | Comparison<br>Condition<br>(prior CHC<br>exposure) | Outcome<br>(method, unit)                               | Group Results                                                                                                  | Between Group<br>Comparison     | DB Score<br>(0-32) |
|--------------------------------------|----------------------------------------------------------------------------------------|---------------------------------------------------------------------------------------------------------------------------------------------------------|----------------------------------------------------|---------------------------------------------------------|----------------------------------------------------------------------------------------------------------------|---------------------------------|--------------------|
| Hartard,<br>2006<br>(Quasi, GER)     | Never user: n (17<br>(21.1±1.5))<br>CHC A: n (22 (20.6±1.7))<br>CHC B: n (20 (20.8±2)) | CHC A: Oral; EE/DG<br>(20µg/150µg)<br>CHC B: Oral; EE/LNG<br>(20µg/100µg)<br>User CHC A: 12 mo<br>(2.4 ± 1.2yrs)<br>User CHC B: 12 mo<br>(1.7 ± 1.8yrs) | Never user<br>(0.4 ± 1.2 yrs)                      | RADIUS BMC subsequent<br>postmenopausal change<br>(SPA) | Mean change<br>Never user: -1.7 ± 0.8<br>Previous user: -1.9 ± 0.7%                                            | NS                              |                    |
|                                      |                                                                                        |                                                                                                                                                         |                                                    | aBMD1 (DXA) g/cm <sup>2</sup>                           | Mean % change (baseline to 12-mo)<br>Never user: 0.47 ± 2.91%<br>CHC A: -1.52 ± 1.80%<br>CHC B: -0.11 ± 3.01%  | CHC A vs. Never user:<br>p<0.05 |                    |
|                                      |                                                                                        |                                                                                                                                                         |                                                    | LUMBAR SPINE BMC<br>(DXA) g                             | Mean % change (baseline to 12-mo)<br>Never user: 0.62 ± 3.06%<br>CHC A: -1.10 ± 2.24%<br>CHC B: -0.52 ± 2.68   | CHC A vs. Never user:<br>p<0.05 |                    |
|                                      |                                                                                        |                                                                                                                                                         |                                                    | aBMD2 (DXA) g/cm <sup>2</sup>                           | Mean % change (baseline to 12-mo)<br>Never user: -.69 ± 3.62%<br>CHC A: -0.30 ± 3.83%<br>CHC B: -0.22 ± 4.38%  | NS                              |                    |
|                                      |                                                                                        |                                                                                                                                                         |                                                    | aBMD5 (DXA) mg/cm <sup>3</sup>                          | Mean % change (baseline to 12-mo)<br>Never user: -1.03 ± 2.97%<br>CHC A: -0.35 ± 4.70%<br>CHC B: -1.95 ± 3.15% | NS                              | 12                 |
|                                      |                                                                                        |                                                                                                                                                         |                                                    | aBMD10 shank 4% (DXA)<br>mg/cm <sup>3</sup>             | Mean % change (baseline to 12-mo)<br>Never user: 0.38 ± 2.50%<br>CHC A: -0.83 ± 1.96%<br>CHC B: -1.04 ± 2.59%  | NS                              |                    |
|                                      |                                                                                        |                                                                                                                                                         |                                                    | aBMD10 shank 14%<br>(DXA) mg/cm <sup>3</sup>            | Mean % change (baseline to 12-mo)<br>Never user: 0.59 ± 1.24%<br>CHC A: 0.45 ± 0.96%<br>CHC B: -0.41 ± 1.33%   | CHC B vs. Never user:<br>p<0.05 |                    |
|                                      |                                                                                        |                                                                                                                                                         |                                                    | aBMD10 shank 38%<br>(DXA) mg/cm <sup>3</sup>            | Mean % change (baseline to 12-mo)<br>Never user: 0.57 ± 0.63%<br>CHC A: 0.22 ± 0.68%<br>CHC B: 0.36 ± 0.57%    | NS                              |                    |

| Author, year<br>(design,<br>country) | Participants<br>n (Mean±SD, Median<br>(min-max), or Mean<br>(95%CI) age years) | CHC<br>Intervention<br>method; compound<br>(dose µg)<br>Duration<br>(prior use) | Comparison<br>Condition<br>(prior CHC<br>exposure) | Outcome<br>(method, unit)                                   | Group Results                                                             | Between Group<br>Comparison                                       | DB Score<br>(0-32) |
|--------------------------------------|--------------------------------------------------------------------------------|---------------------------------------------------------------------------------|----------------------------------------------------|-------------------------------------------------------------|---------------------------------------------------------------------------|-------------------------------------------------------------------|--------------------|
| Hellevik,<br>2017<br>(PC, NOR)       | Never user: n (6,202<br>(55.7±15.2)<br>Previous user: n (11,924<br>(55.7±15.2) | Oral; NR(NR)<br>User: N/A<br>(90,646 person<br>years)                           | Never user<br>(NR)                                 | TKR (medical records)<br>number of cases                    | Never user: 130<br>Previous user: 103                                     | Adjusted HR (95%CI) vs.<br>never users<br>1.36 (1.00, 1.86)       | 18                 |
|                                      |                                                                                |                                                                                 |                                                    | THR (medical records)<br>number of cases                    | Never users: 193<br>Previous user: 133                                    | Adjusted HR (95%CI) vs.<br>never users<br>1.03 (0.79, 1.35)       |                    |
| Herzog, 2020<br>(RC, USA)            | Never user: n (621,798<br>(32.4±6.8)<br>New user: n (2,370,286<br>(26.7±8.1)   | Oral; EE (≤35µg)<br>up to 14.5 years<br>(no use ≥180 days)                      | Never users<br>(no use ≥180<br>days)               | ACL injury (clinical<br>diagnosis,<br>reconstruction) cases | Number of cases (%)<br>Never user: 1620 (0.26%)<br>New user: 3571 (0.15%) | Adjusted HR (95%CI)<br>0.95 (0.89, 1.01)                          | 19                 |
| Jackowski,<br>2016<br>(RC, Canada)   | Never user: n (43<br>(16.3±5.6)<br>Ongoing user: n (67<br>(18.0±6.1)           | Oral; NR(NR)<br>Users: N/A<br>(4.9 ± 3.9 yrs)                                   | Never Users<br>(0 days)                            | aBMD1 (DXA) g/cm <sup>2</sup>                               | NR                                                                        | NS                                                                | 15                 |
|                                      |                                                                                |                                                                                 |                                                    | LUMBAR SPINE BMC<br>(DXA) g                                 | NR                                                                        | NS                                                                |                    |
|                                      |                                                                                |                                                                                 |                                                    | aBMD2 (DXA) g/cm <sup>2</sup>                               | NR                                                                        | NS                                                                |                    |
|                                      |                                                                                |                                                                                 |                                                    | FEMORAL NECK BMC<br>(DXA) g                                 | NR                                                                        | NS                                                                |                    |
|                                      |                                                                                |                                                                                 |                                                    | aBMD3 (DXA) g/cm <sup>2</sup>                               | NR                                                                        | mean (± SE)<br>-0.0099 ± 0.0042                                   |                    |
| WHOLE BODY BMC (DXA)<br>g            | NR                                                                             | NS                                                                              |                                                    |                                                             |                                                                           |                                                                   |                    |
| Kelsey, 2007<br>(PC, USA)            | n (127(22.0±2.6)                                                               | Oral; NR(NR)<br>2 years<br>(no use within 6<br>months)                          | Never Users<br>(no use within 6<br>months)         | stress fracture (imaging)                                   | NR                                                                        | Adjusted rate ratio (95%CI)<br>2.22 (0.65, 7.69)                  | 15                 |
| Lee, 2015<br>(Quasi, USA)            | Never user: n<br>(25(25.2±1.6)<br>Ongoing user: n (15<br>(25.1±2.8)            | Oral; EE (30-55µg)<br>5 days<br>(at least 1 yr)                                 | Never Users<br>(NR)                                | Anterior Tibial<br>Translation (KT-2000)<br>mm              | Baseline mean<br>Never user: 5.3 ± 1.0<br>Ongoing user: 4.5 ± 0.6         | p=0.01                                                            | 12                 |
| Leung, 2019<br>(PC,<br>Singapore)    | Never users: n (25,905<br>(57±8.3)<br>Previous user: n (9,280<br>(53.3±6.2)    | Oral; NR(NR)<br>Users: N/A<br>(NR)                                              | Never Users<br>(NR)                                | TKR (medical record)<br>count                               | Number of cases<br>Never users: 1163<br>Previous users: 482               | Adjusted HR (95%CI),<br>never user reference<br>1.18 (1.05, 1.32) | 18                 |



| Author, year (design, country)                        | Participants n (Mean±SD, Median (min-max), or Mean (95%CI) age years)                 | CHC Intervention method; compound (dose µg) Duration (prior use)                                 | Comparison Condition (prior CHC exposure) | Outcome (method, unit)                   | Group Results                                                                                                                                                                                | Between Group Comparison                                                                                                               | DB Score (0-32) |
|-------------------------------------------------------|---------------------------------------------------------------------------------------|--------------------------------------------------------------------------------------------------|-------------------------------------------|------------------------------------------|----------------------------------------------------------------------------------------------------------------------------------------------------------------------------------------------|----------------------------------------------------------------------------------------------------------------------------------------|-----------------|
| Liederbach, 2008 (PC, USA)                            | Never user: 47 (18-41)<br>Ongoing user: 136 (18-41)                                   | Oral; NR(NR)<br>NR (NR)                                                                          | Never Users (NR)                          | ACL injury (clinical exam/imaging) count | Number of cases<br>Never user: 5<br>Ongoing user: 5                                                                                                                                          | p=0.13                                                                                                                                 | 14              |
| Liu, 2011 (Quasi, China)                              | Never user: n (53 (29.9±4.0))<br>CHC A: n (46 (29.3±4.1))<br>CHC B: n (55 (29.0±3.9)) | CHC A: Oral; EE/DG (30µg/0.15mg)<br>CHC B: Oral; EE/CA (35µg/2mg)<br>2 years (no use ≥ 6 months) | Never Users (no use ≥ 6 months)           | LUMBAR SPINE BMD (DXA) g/cm <sup>2</sup> | Mean pre-post (baseline vs. 24-mo)<br>Never user: 1.109±0.112 vs. 1.108±0.109<br>CHC A: 1.110±0.114 vs. 1.106±0.109<br>CHC B: 1.109±0.111 vs. 1.110±0.111                                    | Baseline: p=0.99<br>24 month: p=0.98                                                                                                   | 17              |
|                                                       |                                                                                       |                                                                                                  |                                           | FEMORAL NECK BMD (DXA) g/cm <sup>2</sup> | Mean pre-post (baseline vs. 24-mo)<br>Never user: 0.913±0.088 vs. 0.913±0.091<br>CHC A: 0.914±0.089 vs. 0.899 ± 0.092<br>CHC B: 0.912±0.091 vs. 0.912±0.091                                  | Baseline: p=0.99<br>24 months: p=0.70                                                                                                  |                 |
| Liu, 2009 (PC, UK)                                    | Never user: n (519,734 (56.0±4.7))<br>Previous user: n (772,033 (56.0±4.7))           | Oral; NR(NR)<br>N/A (NR)                                                                         | Never Users (NR)                          | TKR (medical record) count               | Number of cases<br>Never user: 5025<br>Previous user: 4774                                                                                                                                   | adjusted RR (95%CI)<br>1.00 (0.96,1.04)                                                                                                | 18              |
|                                                       |                                                                                       |                                                                                                  |                                           | THR (medical record) count               | Number of cases<br>Never user: 5850<br>Previous user: 6118                                                                                                                                   | adjusted RR (95%CI)<br>1.02 (0.98,1.06)                                                                                                |                 |
| Massai, 2005 (Quasi; Finland, Chile, the Netherlands) | Never user: n (31 (29.1±4.1))<br>Ongoing user: n (76 (26.6±4.9))                      | Ring; EE/ET (15µg/120µg)<br>24 months (no use ≥ 1 month)                                         | Never Users (NR)                          | LUMBAR SPINE BMD (DXA) g/cm <sup>2</sup> | Z-score change (baseline to 12-mo)<br>Never user: 0.212 ± 0.254<br>New User: 0.058 ± 0.212<br><br>Z-score change (baseline to 24-mo)<br>Never user: 0.257 ± 0.328<br>New User: 0.093 ± 0.278 | Difference of mean change (95%CI)<br>12-months: 12 -0.222 (-0.369, -0.076), p (0.003)<br>24 months: -0.341 (-0.473, -0.208), p< 0.0001 | 14              |

| Author, year<br>(design,<br>country) | Participants<br>n (Mean±SD, Median<br>(min-max), or Mean<br>(95%CI) age years)                     | CHC<br>Intervention<br>method; compound<br>(dose µg)<br>Duration<br>(prior use)    | Comparison<br>Condition<br>(prior CHC<br>exposure) | Outcome<br>(method, unit)                                                   | Group Results                                                                                                                                                                                | Between Group<br>Comparison                                                                                                                   | DB Score<br>(0-32) |
|--------------------------------------|----------------------------------------------------------------------------------------------------|------------------------------------------------------------------------------------|----------------------------------------------------|-----------------------------------------------------------------------------|----------------------------------------------------------------------------------------------------------------------------------------------------------------------------------------------|-----------------------------------------------------------------------------------------------------------------------------------------------|--------------------|
|                                      |                                                                                                    |                                                                                    |                                                    | FEMORAL NECK BMD<br>(DXA) g/cm <sup>2</sup>                                 | Z-score change (baseline to 12-mo)<br>Never user: 0.085 ± 0.336<br>New User: 0.057 ± 0.233<br><br>Z-score change (baseline to 24-mo)<br>Never user: 0.223 ± 0.286<br>New User: 0.061 ± 0.284 | Difference of mean change<br>(95%CI)<br>12-months: -0.156<br>(-0.332, 0.019), p(0.080)<br>24-months: -0.267<br>(-0.383, -0.151), p<<br>0.0001 |                    |
| Massaro,<br>2010<br>(Quasi, Italy)   | Never user: n (17<br>(25.2±6.4)<br>CHC patch: n (16<br>(27.3±2.7)<br>CHC Ring: n (16<br>(26.0±5.4) | patch; EE/NGMN<br>(20µg/150µg)<br>Ring; EE/ET<br>(15µg/120µg)<br>12 months<br>(NR) | Never Users<br>(NR)                                | LUMBAR SPINE BMD<br>(DXA) g/cm <sup>2</sup>                                 | Mean (Baseline vs. 12-month)<br>Never user: 1.041±0.08 vs. 1.042±0.02<br>CHC patch: 1.040±0.12 vs. 1.041±0.0<br>CHC Ring: 1.042±0.15 vs. 1.041±0.18                                          | NS                                                                                                                                            | 17                 |
|                                      |                                                                                                    |                                                                                    |                                                    | BGP (serum)                                                                 | NR                                                                                                                                                                                           | p<0.05                                                                                                                                        |                    |
|                                      |                                                                                                    |                                                                                    |                                                    | PYD (urine)                                                                 | NR                                                                                                                                                                                           | p<0.05                                                                                                                                        |                    |
|                                      |                                                                                                    |                                                                                    |                                                    | D-PYD (urine)                                                               | NR                                                                                                                                                                                           | NS                                                                                                                                            |                    |
|                                      |                                                                                                    |                                                                                    |                                                    | LUMBAR SPINE BMD<br>(dual-photon<br>absorptiometry) g/cm <sup>2</sup>       | Mean % Change (baseline to 24-mo)<br>Never user: 0.33 ± 4.2%<br>< 5 yrs CHC use: 0.09 ± 3.2%<br>> 5 yrs CHC use: -0.02 ± 4.0 %                                                               | NS                                                                                                                                            |                    |
| Mazess, 1991<br>(PC, USA)            | n (300 (20-39)                                                                                     | Oral; NR(NR)<br>NR(NR)                                                             | Never Users<br>(NR)                                |                                                                             |                                                                                                                                                                                              |                                                                                                                                               | 8                  |
|                                      |                                                                                                    |                                                                                    |                                                    | RADIUS BMD one-third<br>(single-photon<br>absorptiometry) g/cm <sup>2</sup> | Mean % Change (baseline to 20-mo)<br>Never user: -1.12 ± 4.7%<br>< 5 yrs: 0.42 ± 4.2%<br>> 5 yrs: -0.84 ± 5.0%                                                                               | NS                                                                                                                                            |                    |
| Nappi, 2003<br>(Quasi, Italy)        | Never user: n (19<br>(29.2±4.8)                                                                    | CHC A: Oral; EE/GD<br>(20µg/75µg)                                                  |                                                    | LUMBAR SPINE BMD<br>(DXA) g/cm <sup>2</sup>                                 | NR                                                                                                                                                                                           | NS                                                                                                                                            | 16                 |

| Author, year<br>(design,<br>country) | Participants<br>n (Mean±SD, Median<br>(min-max), or Mean<br>(95%CI) age years)           | CHC<br>Intervention<br>method; compound<br>(dose µg)<br>Duration<br>(prior use)      | Comparison<br>Condition<br>(prior CHC<br>exposure) | Outcome<br>(method, unit)                                           | Group Results                                                                                                                                                                           | Between Group<br>Comparison                                                                                                      | DB Score<br>(0-32)                          |                                                                                                                                                         |                  |    |
|--------------------------------------|------------------------------------------------------------------------------------------|--------------------------------------------------------------------------------------|----------------------------------------------------|---------------------------------------------------------------------|-----------------------------------------------------------------------------------------------------------------------------------------------------------------------------------------|----------------------------------------------------------------------------------------------------------------------------------|---------------------------------------------|---------------------------------------------------------------------------------------------------------------------------------------------------------|------------------|----|
| Nappi, 2005<br>(Quasi, Italy)        | CHC A: n (19 (28.7±6.2))<br>CHC B: n (18 (29±5.8))                                       | CHC B: Oral; EE/GD<br>(15µg/60µg)<br>12 months<br>(NR)                               | Never users<br>(NR)                                | BGP (serum)                                                         | NR                                                                                                                                                                                      | NS                                                                                                                               | 24                                          |                                                                                                                                                         |                  |    |
|                                      |                                                                                          |                                                                                      |                                                    | PYD (urine)                                                         | NR                                                                                                                                                                                      | p < 0.05                                                                                                                         |                                             |                                                                                                                                                         |                  |    |
|                                      |                                                                                          |                                                                                      |                                                    | D-PYD (urine)                                                       | NR                                                                                                                                                                                      | p < 0.05                                                                                                                         |                                             |                                                                                                                                                         |                  |    |
|                                      | Never user: n (22<br>(28.1±6.1))<br>CHC A: n (23 (27.2±5.3))<br>CHC B: n (22 (26.9±5.5)) | CHC A: Oral; EE/DP<br>(30µg/3mg)<br>CHC B: EE/GD<br>(30µg/75µg)<br>12 months<br>(NR) | Never Users<br>(NR)                                | LUMBAR SPINE BMD<br>(DXA) g/cm <sup>2</sup>                         | Mean (baseline vs. 12-mo)<br>Never user: 1.042±0.16 vs. 1.039±0.09<br>CHC A: 1.039±0.08 vs. 1.065±0.11<br>CHC B: 1.041±0.09 vs. 1.047±0.10                                              | NS                                                                                                                               |                                             |                                                                                                                                                         |                  |    |
|                                      |                                                                                          |                                                                                      |                                                    | PYD (urine)                                                         | NR                                                                                                                                                                                      | p < 0.05                                                                                                                         |                                             |                                                                                                                                                         |                  |    |
|                                      |                                                                                          |                                                                                      |                                                    | D-PYD (urine)                                                       | NR                                                                                                                                                                                      | p < 0.05                                                                                                                         |                                             |                                                                                                                                                         |                  |    |
| Procter-Gray,<br>2008<br>(RCT, USA)  | Never user: n (53<br>(21.9±2.6))<br>New user: n (48<br>(22.3±2.7))                       | Oral; EE/NG<br>(30µg/0.3mg)<br>24 months<br>(no use ≥ 6 months)                      | Never users<br>(no use ≥ 6<br>months)              | LBM (DXA) kg/yr                                                     | Mean annual rate of change<br>irregular menstrual group<br>Never user: 0.30±0.28<br>New user: 0.32±0.29<br><br>regular menstrual group<br>Never user: -0.10±0.14<br>New user: 0.77±0.17 | Mean difference in change<br>rate ± SE<br>Irregular group: 0.02 ±<br>0.35, p (0.96)<br>Regular group: 0.77 ± 0.17,<br>p < 0.0001 | 22                                          |                                                                                                                                                         |                  |    |
|                                      |                                                                                          |                                                                                      |                                                    | Never user: n (114 (18-<br>39))<br>Ongoing user: n (64 (18-<br>39)) | Oral; EE (30-35µg)<br>36 months<br>(3.7 years [0.1 to 15<br>yrs])                                                                                                                       | Never Users<br>(no use ≥12<br>months)                                                                                            | LUMBAR SPINE BMD<br>(DXA) g/cm <sup>2</sup> | Adjusted Mean (baseline to 36-mo)<br>Never user: 1.06<br>Ongoing user: 1.06<br>% Change (baseline to 36-mo)<br>Never user: 1.34%<br>Ongoing user: 1.61% | p=0.65<br>p=0.73 | 16 |
|                                      |                                                                                          |                                                                                      |                                                    |                                                                     |                                                                                                                                                                                         |                                                                                                                                  | FEMORAL NECK BMD<br>(DXA) g/cm <sup>2</sup> | Adjusted Mean (baseline to 36-mo)<br>Never user: 0.95<br>Ongoing user: 0.95<br>% Change (baseline to 36-mo)<br>Never user: 0.12%<br>Ongoing user: 0.48% | p=0.60<br>p=0.55 |    |

| Author, year<br>(design,<br>country) | Participants<br>n (Mean±SD, Median<br>(min-max), or Mean<br>(95%CI) age years)                                                                                            | CHC<br>Intervention<br>method; compound<br>(dose µg)<br>Duration<br>(prior use)                                                                 | Comparison<br>Condition<br>(prior CHC<br>exposure) | Outcome<br>(method, unit)                                                                                                | Group Results                                                                                                                                                                                                                          | Between Group<br>Comparison        | DB Score<br>(0-32) |
|--------------------------------------|---------------------------------------------------------------------------------------------------------------------------------------------------------------------------|-------------------------------------------------------------------------------------------------------------------------------------------------|----------------------------------------------------|--------------------------------------------------------------------------------------------------------------------------|----------------------------------------------------------------------------------------------------------------------------------------------------------------------------------------------------------------------------------------|------------------------------------|--------------------|
|                                      |                                                                                                                                                                           |                                                                                                                                                 |                                                    |                                                                                                                          | Adjusted Mean (baseline to 36-mo)<br>Never user: 1.1<br>Ongoing user: 1.1<br>% Change (baseline to 36-mo)<br>Never user: 0.66%<br>Ongoing user: 0.68%                                                                                  | p=0.90<br>p=0.96                   |                    |
| Reiger, 2016<br>(PC, USA)            | Never user: n (10<br>(20.2±1.0)<br>Ongoing user: n (13<br>(20.5±1.8)                                                                                                      | Oral; EE/PG (20µg-<br>35µg/100µg-1000µg)<br>3 weeks<br>(2.7 ± 1.9 yrs)                                                                          | Never Users<br>(NR)                                | BAP (serum)<br>CTX (serum)<br>LUMBAR SPINE BMD<br>(DXA) g/cm <sup>2</sup><br>FEMORAL NECK BMD<br>(DXA) g/cm <sup>2</sup> | (baseline)<br>NR<br>NR<br>NR                                                                                                                                                                                                           | NS<br>NS<br>NR<br>NR               | 12                 |
| Rome, 2004<br>(PC, USA)              | Never user: n (152<br>(14.8±1.5)<br>New user: n (165<br>(16±1.4)                                                                                                          | Oral; NR(NR)<br>12 months<br>(no use in past 6<br>months)                                                                                       | Never Users<br>(no use in past 6<br>months)        | BAP (serum)<br><br>D-PYD (urine)<br>nmol/mmol                                                                            | Mean (12-mo, adjusted for baseline)<br>Never user: 40.4±1.03<br>New user: 35.7±1.03<br><br>Mean (12-mo, adjusted for baseline)<br>Never user: 9.8 ±1.03<br>New user: 9.0 ±1.03                                                         | p=0.004<br><br>p=0.08              | 13                 |
| Scholes, 2011<br>(PC, USA)           | Adolescent<br>Never user: n (28<br>(16.4±0.1)<br>Ongoing user: n (49<br>(16.8±0.1)<br>Young women<br>Never user: n (18<br>(24.1±0.3)<br>Ongoing user: n (44<br>(24.6±0.3) | Oral; EE <30µg or 30-<br>35µg<br>Adolescent Users: 36<br>months (9.0 [0.8]<br>months)<br>Young Women Users:<br>36 months (19.2 [2.5]<br>months) | Never user<br>(no use for 2 yrs)                   | LUMBAR SPINE BMD<br>(DXA) g/cm <sup>2</sup>                                                                              | Adjusted % change (baseline to 24-mo),<br>Adjusted mean change (baseline to 36-mo)<br>Adolescents<br>Never user: 2.26%, 0.0216<br>Ongoing user (30-35 dose): 1.32%, 0.0115<br><br>Young women<br>Never user: 0.35%<br>Ongoing user: NR | Adolescents: NR<br>Young Women: NS | 17                 |

| Author, year<br>(design,<br>country) | Participants<br>n (Mean±SD, Median<br>(min-max), or Mean<br>(95%CI) age years) | CHC<br>Intervention<br>method; compound<br>(dose µg)<br>Duration<br>(prior use) | Comparison<br>Condition<br>(prior CHC<br>exposure) | Outcome<br>(method, unit)                                 | Group Results                                                                                                                                                                                                                   | Between Group<br>Comparison                                                                                          | DB Score<br>(0-32) |
|--------------------------------------|--------------------------------------------------------------------------------|---------------------------------------------------------------------------------|----------------------------------------------------|-----------------------------------------------------------|---------------------------------------------------------------------------------------------------------------------------------------------------------------------------------------------------------------------------------|----------------------------------------------------------------------------------------------------------------------|--------------------|
|                                      |                                                                                |                                                                                 |                                                    | WHOLE BODY BMD (DXA)<br>g/cm <sup>2</sup>                 | Adjusted % change (baseline to 24-mo),<br>Adjusted mean change (0 to 36-mo)<br>Adolescents<br>Never user: 2.03%, 0.0214<br>Ongoing user (30-35 dose): 1.45%, 0.0146<br><br>Young women<br>Never user: 0.90%<br>Ongoing user: NR | Adolescents: NR<br>Young Women: NS                                                                                   |                    |
|                                      |                                                                                |                                                                                 |                                                    | TOTAL HIP BMD (DXA)<br>g/cm <sup>2</sup>                  | Adjusted % change (baseline to 24-mo)<br>Adolescents<br>Never user: 0.67%<br>Ongoing user (30-35 dose): NR<br><br>Young women<br>Never user: -0.42%<br>Ongoing user: NR                                                         | Adolescents: NR<br>Young Women: NS                                                                                   |                    |
|                                      |                                                                                |                                                                                 |                                                    | Spinal OA (medical<br>record/referrals)                   | NR                                                                                                                                                                                                                              | adjusted RR (95%CI)<br>Ever used: 1.3 (0.9, 1.7)<br>Recently used: 1.0 (0.6,<br>1.6)<br>Used in past: 1.3 (1.0, 1.8) |                    |
| Vessey ,1999<br>(RC, UK)             | n (NR (25-39)                                                                  | Oral; estrogen<br>(≥50µg)<br>N/A (5 to ≥97)                                     | Never Users<br>(0 days)                            | Displaced cervicval disc<br>(medical<br>record/referrals) | NR                                                                                                                                                                                                                              | adjusted RR (95%CI)<br>Ever used: 1.5 (0.9, 2.5)<br>Recently used: 1.3 (0.7,<br>2.6)<br>Used in past: 1.6 (0.9, 2.8) | 10                 |
|                                      |                                                                                |                                                                                 |                                                    | Displaced lumbar disc<br>(medical<br>record/referrals)    | NR                                                                                                                                                                                                                              | adjusted RR (95%CI)<br>Ever used: 1.1 (0.9, 1.4)<br>Recently used: 1.1 (0.8,<br>1.5)<br>Used in past: 1.1 (0.8, 1.4) |                    |

| Author, year<br>(design,<br>country) | Participants<br>n (Mean±SD, Median<br>(min-max), or Mean<br>(95%CI) age years)             | CHC<br>Intervention<br>method; compound<br>(dose µg)<br>Duration<br>(prior use) | Comparison<br>Condition<br>(prior CHC<br>exposure) | Outcome<br>(method, unit)                             | Group Results | Between Group<br>Comparison                                                                                                                                                                                                  | DB Score<br>(0-32) |
|--------------------------------------|--------------------------------------------------------------------------------------------|---------------------------------------------------------------------------------|----------------------------------------------------|-------------------------------------------------------|---------------|------------------------------------------------------------------------------------------------------------------------------------------------------------------------------------------------------------------------------|--------------------|
| Vessey, 1998<br>(RC, UK)             | Never user: 123,000<br>woman-years (25-39)<br>Ongoing user: 187,000<br>woman-years (25-39) | Oral; NR(NR)<br>N/A (5 to ≥97)                                                  | Never Users<br>(0 days)                            | Other displaced disc<br>(medical<br>record/referrals) | NR            | adjusted RR (95%CI)<br>Ever used: 1.0 (0.8, 1.3)<br>Recently used: 1.0 (0.8,<br>1.4)<br>Used in past: 1.0 (0.8, 1.3)                                                                                                         | 10                 |
|                                      |                                                                                            |                                                                                 |                                                    | Cervicalgia (medical<br>record/referrals)             | NR            | adjusted RR (95%CI)<br>Ever used: 0.9 (0.7, 1.1)<br>Recently used: 1.0 (0.7,<br>1.4)<br>Used in past: 0.8 (0.6, 1.0)                                                                                                         |                    |
|                                      |                                                                                            |                                                                                 |                                                    | Backache (medical<br>record/referrals)                | NR            | adjusted RR (95%CI)<br>Ever used: 1.1 (0.9, 1.2)<br>Recently used: 0.9 (0.7,<br>1.1)<br>Used in past: 1.2 (1.0, 1.3)                                                                                                         |                    |
|                                      |                                                                                            |                                                                                 |                                                    | Sprains/strains (medical<br>record/referrals)         | NR            | adjusted RR (95%CI)<br>Ever used: 1.0 (0.8, 1.2)<br>Recently used: 1.0 (0.8,<br>1.4)<br>Used in past: 0.9 (0.7, 1.2)                                                                                                         |                    |
|                                      |                                                                                            |                                                                                 |                                                    | Any fracture (medical<br>record/referrals)            | NR            | adjusted RR (95%CI)<br>≤1 year use: 0.8 (0.5, 1.2)<br>13-24 months: 0.9 (0.6,<br>1.3)<br>25-48 months: 1.2 (1.0,<br>1.5)<br>49-72 months: 1.2 (0.9,<br>1.4)<br>73-96 months: 1.2 (1.0,<br>1.5)<br>≥97 months: 1.2 (1.1, 1.4) |                    |
|                                      |                                                                                            |                                                                                 |                                                    | Forearm Fracture<br>(medical<br>record/referrals)     | NR            | adjusted RR (95%CI)<br>≤1 year use: 1.1 (0.3, 2.8)<br>13-24 months: 1.8 (0.8,<br>3.8)<br>25-48 months: 1.3 (0.7,<br>2.2)<br>49-72 months: 1.1 (0.6,<br>2.0)<br>73-96 months: 1.1 (0.6,<br>2.1)<br>≥97 months: 1.5 (1.1, 2.1) |                    |

| Author, year<br>(design,<br>country) | Participants<br>n (Mean±SD, Median<br>(min-max), or Mean<br>(95%CI) age years)                                                                                      | CHC<br>Intervention<br>method; compound<br>(dose µg)<br>Duration<br>(prior use) | Comparison<br>Condition<br>(prior CHC<br>exposure) | Outcome<br>(method, unit)                           | Group Results                                                                                                                                               | Between Group<br>Comparison                                                                                                                                                                                                  | DB Score<br>(0-32) |
|--------------------------------------|---------------------------------------------------------------------------------------------------------------------------------------------------------------------|---------------------------------------------------------------------------------|----------------------------------------------------|-----------------------------------------------------|-------------------------------------------------------------------------------------------------------------------------------------------------------------|------------------------------------------------------------------------------------------------------------------------------------------------------------------------------------------------------------------------------|--------------------|
|                                      |                                                                                                                                                                     |                                                                                 |                                                    |                                                     |                                                                                                                                                             | adjusted RR (95%CI)<br>≤1 year use: 0.7 (0.1, 2.1)<br>13-24 months: 1.6 (0.7,<br>3.2)<br>25-48 months: 0.9 (0.4,<br>1.6)<br>49-72 months: 0.7 (0.3,<br>1.3)<br>73-96 months: 1.3 (0.7,<br>2.3)<br>≥97 months: 1.0 (0.7, 1.5) |                    |
|                                      |                                                                                                                                                                     |                                                                                 |                                                    | Ankle Fracture (medical<br>record/referrals)        | NR                                                                                                                                                          |                                                                                                                                                                                                                              |                    |
|                                      |                                                                                                                                                                     |                                                                                 |                                                    | Tarsal/metatarsals<br>(medical<br>record/referrals) | NR                                                                                                                                                          | adjusted RR (95%CI)<br>≤1 year use: 0.4 (0.0, 1.5)<br>13-24 months: 0.9 (0.3,<br>2.2)<br>25-48 months: 1.2 (0.7,<br>2.0)<br>49-72 months: 1.2 (0.7,<br>2.0)<br>73-96 months: 1.2 (0.6,<br>2.0)<br>≥97 months: 0.8 (0.5, 1.2) |                    |
|                                      |                                                                                                                                                                     |                                                                                 |                                                    | LUMBAR SPINE BMD<br>(DXA) g/cm <sup>2</sup>         | Mean (baseline)<br>Never users, Ex-: 1.28 ± 0.03<br>Never users, Ex+: 1.25 ± 0.02<br>Ongoing users, Ex-: 1.23 ± 0.02<br>Ongoing users, Ex+: 1.25 ± 0.02     | NS                                                                                                                                                                                                                           |                    |
| Weaver,<br>2001<br>(RCT, USA)        | Never user, Ex-: n (24<br>(24.1±0.8)<br>Never user, Ex+: n (37<br>(23.9 ± 0.7)<br>Ongoing user, Ex-: n (40<br>(24.3±0.6)<br>Ongoing user, Ex+: n (40<br>(24.1± 0.6) | Oral; EE (≤50µg)<br>24 months<br>(NR)                                           | Never Users<br>(NR)                                | LUMBAR SPINE BMC<br>(DXA) g                         | Mean (baseline)<br>Never users, Ex-: 53.02 ± 2.06<br>Never users, Ex+: 50.13 ± 1.14<br>Ongoing users, Ex-: 48.84 ± 1.61<br>Ongoing users, Ex+: 49.88 ± 1.34 | NS                                                                                                                                                                                                                           | 12                 |
|                                      |                                                                                                                                                                     |                                                                                 |                                                    | FEMORAL NECK BMD<br>(DXA) g/cm <sup>2</sup>         | Mean (baseline)<br>Never users, Ex-: 1.04 ± 0.03<br>Never users, Ex+: 1.02 ± 0.02<br>Ongoing users, Ex-: 1.00 ± 0.02<br>Ongoing users, Ex+: 1.01 ± 0.02     | NS                                                                                                                                                                                                                           |                    |

| Author, year<br>(design,<br>country)   | Participants<br>n (Mean±SD, Median<br>(min-max), or Mean<br>(95%CI) age years) | CHC<br>Intervention<br>method; compound<br>(dose µg)<br>Duration<br>(prior use) | Comparison<br>Condition<br>(prior CHC<br>exposure) | Outcome<br>(method, unit)                      | Group Results                                                                                                                                           | Between Group<br>Comparison | DB Score<br>(0-32) |
|----------------------------------------|--------------------------------------------------------------------------------|---------------------------------------------------------------------------------|----------------------------------------------------|------------------------------------------------|---------------------------------------------------------------------------------------------------------------------------------------------------------|-----------------------------|--------------------|
|                                        |                                                                                |                                                                                 |                                                    | WHOLE BODY BMC (DXA)<br>g                      | Mean (baseline)<br>Never users, Ex-: 2663 ± 77<br>Never users, Ex+: 2584 ± 45<br>Ongoing users, Ex-: 2502 ± 69<br>Ongoing users, Ex+: 2507 ± 54         | NS                          |                    |
|                                        |                                                                                |                                                                                 |                                                    | RADIUS BMD (DXA)<br>g/cm <sup>2</sup>          | Mean (baseline)<br>Never users, Ex-: 0.70 ± 0.01<br>Never users, Ex+: 0.96 ± 0.01<br>Ongoing users, Ex-: 1.00 ± 0.02<br>Ongoing users, Ex+: 1.01±0.02   | NS                          |                    |
|                                        |                                                                                |                                                                                 |                                                    | RADIUS BMC (DXA) g/cm                          | Mean (baseline)<br>Never users, Ex-: 0.90 ± 0.02<br>Never users, Ex+: 0.85 ± 0.01<br>Ongoing users, Ex-: 0.86 ± 0.02<br>Ongoing users, Ex+: 0.85 ± 0.02 | NS                          |                    |
|                                        |                                                                                |                                                                                 |                                                    | TROCHANTER BMD (DXA)<br>g/cm <sup>2</sup>      | Mean (baseline)<br>Never users, Ex-: 0.81 ± 0.02<br>Never users, Ex+: 0.79 ± 0.02<br>Ongoing users, Ex-: 0.79 ± 0.02<br>Ongoing users, Ex+: 0.78 ± 0.02 | NS                          |                    |
|                                        |                                                                                |                                                                                 |                                                    | WARD'S TRIANGLE BMD<br>(DXA) g/cm <sup>2</sup> | Mean (baseline)<br>Never users, Ex-: 1.01 ± 0.03<br>Never users, Ex+: 0.99 ± 0.02<br>Ongoing users, Ex-: 0.96 ± 0.03<br>Ongoing users, Ex+: 0.98 ± 0.02 | NS                          |                    |
| <b>Studies Added in Updated Search</b> |                                                                                |                                                                                 |                                                    |                                                |                                                                                                                                                         |                             |                    |
| He, 2022<br>(PC, DEN)                  | Never user/previous<br>user: n (28 (23.8±2.7))                                 | Oral; EE/LNG<br>(30µg/150µg)                                                    | Never                                              | PINP (serum biomarker)                         | Average PINP concentration lower duRing<br>menstrual/pill cycle in ongoing users                                                                        | p=0.108                     | 12                 |



| Author, year (design, country) | Participants n (Mean±SD, Median (min-max), or Mean (95%CI) age years) | CHC Intervention method; compound (dose µg) Duration (prior use) | Comparison Condition (prior CHC exposure)  | Outcome (method, unit)                                       | Group Results                                                                                                       | Between Group Comparison | DB Score (0-32) |
|--------------------------------|-----------------------------------------------------------------------|------------------------------------------------------------------|--------------------------------------------|--------------------------------------------------------------|---------------------------------------------------------------------------------------------------------------------|--------------------------|-----------------|
| Martin, 2021 (PC, UK)          | Ongoing user: n (10 (23.7±2.0))                                       | Ongoing user: 28 days (64.5 ± 26.2 months)                       | user/previous user: 0 (31.9 ± 44.1 months) | CTX (serum biomarker)                                        | Average CTX concentration lower during the menstrual/pill cycle in ongoing users                                    | p <0.05                  | 8               |
|                                |                                                                       |                                                                  |                                            | PINP (serum biomarker) ng·mL <sup>-1</sup>                   | Mean values across menstrual cycle/CHC cycle<br>Never user: 64.9±21.9<br>Ongoing user: 62.9±22.1                    | p=0.81                   |                 |
|                                | Never user: n (14 (21±2))<br>Ongoing user: n (14 (22±4))              | Oral; NR(NR)<br>Users: 28 days (≥ 6 mo)                          | Never Users (NR)                           | β-CTX (serum biomarker) ng·L <sup>-1</sup>                   | Mean values across menstrual cycle/CHC cycle<br>Never user: 560±180<br>Ongoing user: 500±200                        | p=0.37                   |                 |
|                                |                                                                       |                                                                  |                                            | Bone ALP (serum biomarker) U·L <sup>-1</sup>                 | Mean values across menstrual cycle/CHC cycle<br>Never user: 18.9±5.4<br>Ongoing user: 17.6±3.8                      | p=0.47                   |                 |
|                                |                                                                       |                                                                  |                                            | Type I fiber CSA (biopsy) µm <sup>2</sup>                    | Mean pre-post (baseline vs. 10 weeks)<br>Never user 4,658 ± 200 5,056 ± 225<br>Ongoing user 4,418 ± 187 4,850 ± 269 | p=0.97                   |                 |
| Oxfeldt, 2020 (PC, DEN)        | Never user: n (18 (24±3))<br>Ongoing user: n (20 (24±2))              | Oral; NR(NR)<br>Users: 10 weeks (NR)                             | Never Users (NR)                           | Type 2 fiber CSA (biopsy) µm <sup>2</sup>                    | Mean pre-post (baseline vs. 10 weeks)<br>Never user 4,753 ± 254 5,431 ± 244<br>Ongoing user 4,241 ± 202 5,125 ± 220 | p=0.5                    |                 |
|                                |                                                                       |                                                                  |                                            | Myonuclei total fiber (biopsy) per fiber                     | Mean pre-post (baseline vs. 10 weeks)<br>Never user 1.72 ± 0.13 1.88 ± 0.16<br>Ongoing user 1.53 ± 0.14 1.64 ± 0.13 | p=0.94                   |                 |
|                                |                                                                       |                                                                  |                                            | Myonuclei Type I (biopsy) per fiber                          | Mean pre-post (baseline vs. 10 weeks)<br>Never user 3.03 ± 0.18 3.14 ± 0.18<br>Ongoing user 2.85 ± 0.16 2.79 ± 0.12 | p=0.58                   |                 |
|                                |                                                                       |                                                                  |                                            | Myonuclei Type II (biopsy) per fiber                         | Mean pre-post (baseline vs. 10 weeks)<br>Never user 3.49 ± 0.19 3.88 ± 0.27<br>Ongoing user 3.41 ± 0.22 3.76 ± 0.23 | p=0.95                   |                 |
|                                |                                                                       |                                                                  |                                            | Myonuclear domain Type I (biopsy) µm <sup>2</sup> /myonuclei | Mean pre-post (baseline vs. 10 weeks)<br>Never user 667 ± 55.9 628 ± 34.4<br>Ongoing user 647 ± 27.6 599 ± 25.9     | p=0.64                   | 10              |

| Author, year<br>(design,<br>country)    | Participants<br>n (Mean±SD, Median<br>(min-max), or Mean<br>(95%CI) age years)                                                                                                                   | CHC<br>Intervention<br>method; compound<br>(dose µg)<br>Duration<br>(prior use) | Comparison<br>Condition<br>(prior CHC<br>exposure) | Outcome<br>(method, unit)                                                                                      | Group Results                                                                                                           | Between Group<br>Comparison | DB Score<br>(0-32) |
|-----------------------------------------|--------------------------------------------------------------------------------------------------------------------------------------------------------------------------------------------------|---------------------------------------------------------------------------------|----------------------------------------------------|----------------------------------------------------------------------------------------------------------------|-------------------------------------------------------------------------------------------------------------------------|-----------------------------|--------------------|
| Sung, 2022<br>(PC, GER)                 | Never user: (muscle<br>thickness group n (40,<br>fibre composition group<br>n (14) 25.00±4.56<br>Ongoing user: (muscle<br>thickness group n (34,<br>fibre composition group<br>n (12) 22.39±2.30 | Oral; EE (20-30µg)<br>Users: 20 weeks<br>(minimum 12<br>months)                 | Never users<br>(no use in past<br>year)            | Myonuclear domain Type<br>II (biopsy) µm <sup>2</sup> /myonuclei                                               | Mean pre-post (baseline vs. 10 weeks)<br>Never user 821 ± 52.6 772 ± 52.6<br>Ongoing user 763 ± 46.7 731 ± 52.8         | p=0.99                      | 9                  |
|                                         |                                                                                                                                                                                                  |                                                                                 |                                                    | Myosin heavy chain<br>protein distribution Type<br>I (biopsy) %                                                | Mean pre-post (baseline vs. 10 weeks)<br>Never user 51.1 ± 2.2 53.3 ± 1.2<br>Ongoing user 52.6 ± 2.2 49.8 ± 1.8         | p=0.08                      |                    |
|                                         |                                                                                                                                                                                                  |                                                                                 |                                                    | Myosin heavy chain<br>protein distribution Type<br>IIa (biopsy) %                                              | Mean pre-post (baseline vs. 10 weeks)<br>Never user 45.0 ± 2.3 44.9 ± 1.2<br>Ongoing user 39.9 ± 1.5a 46.8 ± 1.4        | p<0.01                      |                    |
|                                         |                                                                                                                                                                                                  |                                                                                 |                                                    | Myosin heavy chain<br>protein distribution Type<br>IIx (biopsy) %                                              | Mean pre-post (baseline vs. 10 weeks)<br>Never user 3.8 ± 0.9 1.8 ± 0.6<br>Ongoing user 7.5 ± 1.3 3.4 ± 0.7             | p=0.57                      |                    |
|                                         |                                                                                                                                                                                                  |                                                                                 |                                                    | Muscle thickness of<br>rectus femoris, vastus<br>intermedius, vastus<br>lateralis (ultrasound) cm <sup>2</sup> | Mean pre-post (baseline vs. 12 weeks)<br>Never user: 6.13±1.08 vs 6.61±1.16<br>Ongoing user 5.98±0.57 vs 6.48±0.77      | p=0.89                      |                    |
|                                         |                                                                                                                                                                                                  |                                                                                 |                                                    | Muscle fibre thickness<br>Type I (biopsy) µm                                                                   | Mean pre-post (baseline vs. 12 weeks)<br>Never user: 53.43±6.51 vs 56.83±6.51<br>Ongoing user: 53.45±6.33 vs 54.29±5.95 | p=0.43                      |                    |
|                                         |                                                                                                                                                                                                  |                                                                                 |                                                    | Muscle fibre thickness<br>Type II (biopsy) µm                                                                  | Mean pre-post (baseline vs. 12 weeks)<br>Never user: 46.24±7.67 vs 53.39±6.63<br>Ongoing user: 53.45±6.33 vs 54.29±5.95 | p=0.43                      |                    |
|                                         |                                                                                                                                                                                                  |                                                                                 |                                                    | Muscle nucleus-to-fibre<br>Type I (biopsy) ratio                                                               | Mean pre-post (baseline vs. 12 weeks)<br>Never user: 3.04±0.63 vs 3.65±1.02<br>Ongoing user: 3.20±0.65 vs 3.35±0.77     | p=0.26                      |                    |
| Muscle fibre ratio Type I<br>(biopsy) % | Mean pre-post (baseline vs. 12 weeks)<br>Never user: 42.67±12.52 vs 40.81±12.61<br>Ongoing user: 44.12±15.00 vs 35.95±13.37                                                                      | p=0.84                                                                          |                                                    |                                                                                                                |                                                                                                                         |                             |                    |

| Author, year<br>(design,<br>country) | Participants<br>n (Mean±SD, Median<br>(min-max), or Mean<br>(95%CI) age years) | CHC<br>Intervention<br>method; compound<br>(dose µg)<br>Duration<br>(prior use) | Comparison<br>Condition<br>(prior CHC<br>exposure)                                                                                                          | Outcome<br>(method, unit)                                      | Group Results                                                                                                                                                                               | Between Group<br>Comparison                                                                                                                                                                                | DB Score<br>(0-32) |
|--------------------------------------|--------------------------------------------------------------------------------|---------------------------------------------------------------------------------|-------------------------------------------------------------------------------------------------------------------------------------------------------------|----------------------------------------------------------------|---------------------------------------------------------------------------------------------------------------------------------------------------------------------------------------------|------------------------------------------------------------------------------------------------------------------------------------------------------------------------------------------------------------|--------------------|
| Yoo, 2021<br>(RC, Korea)             | n (1 272 115 (61.0±8.1))                                                       | Oral; NR(NR)                                                                    | Never users<br>(never use:<br>79.8% of<br>participants<br><1y: 9.2% of<br>participants<br>1y+: 6.1% of<br>participants<br>unknown: 4.9%<br>of participants) | Muscle fibre ratio Type II<br>(biopsy) %                       | Mean pre-post (baseline vs. 12 weeks)<br>Never user: 57.33±12.52 vs 59.19±12.61<br>Ongoing user: 55.88±15.00 vs 60.05±13.37                                                                 | p=0.84                                                                                                                                                                                                     | 23                 |
|                                      |                                                                                |                                                                                 |                                                                                                                                                             | Incident fracture<br>(medical record) count                    | Number of cases<br>Any fractures (189 883 (14.9%)<br>Vertebral fractures (72 732<br>Hip fractures (11 153<br>Others fractures (106 895                                                      | OC use for 1 year or<br>longer<br>any fracture: aHR 1.03<br>(1.01-1.05)<br>vertebral fracture: aHR<br>1.06 (1.03-1.09)<br>hip fracture: aHR 1.06<br>(0.97-1.15)<br>other fracture: aHR 1.03<br>(1.00-1.02) |                    |
|                                      |                                                                                |                                                                                 |                                                                                                                                                             | total vBMD10 4% site<br>(HRpQCT) mg HA/cm <sup>3</sup>         | Mean pre-post (week 1 vs. week 14 vs. week<br>28 vs. week 44)<br>Never user: 245±24 vs. 248±23 vs. 250±25 vs.<br>253±23<br>Ongoing user: 240 ± 21 vs. 243 ± 21 vs. 246 ±<br>23 vs. 250 ± 21 | p≥0.3                                                                                                                                                                                                      |                    |
| O'Leary, 2021<br>(PC, UK)            | Never user: 11<br>Ongoing user: 18<br>(24±2)                                   | Oral; NR(NR)<br>Users: 44 weeks<br>(NR)                                         | Never Users<br>(NR)                                                                                                                                         | trabecular vBMD10 4%<br>site (HRpQCT) mg<br>HA/cm <sup>3</sup> | Mean pre-post (week 1 vs. week 14 vs. week<br>28 vs. week 44)<br>Never user: 203±24 vs. 205±23 vs. 207±24 vs.<br>210±22<br>Ongoing user: 197±18 vs. 199±16 vs. 202±17<br>vs. 204±15         | p≥0.3                                                                                                                                                                                                      | 15                 |
|                                      |                                                                                |                                                                                 |                                                                                                                                                             | cortical vBMD10 4% site<br>(HRpQCT) mg HA/cm <sup>3</sup>      | Mean pre-post (week 1 vs. week 14 vs. week<br>28 vs. week 44)<br>Never user: 745±34 vs. 744±33 vs. 739±42 vs.<br>741±34<br>Ongoing user: 748±48 vs. 750±48 vs. 745±57<br>vs. 754±52         | p≥0.3                                                                                                                                                                                                      |                    |

| Author, year<br>(design,<br>country) | Participants<br>n (Mean±SD, Median<br>(min-max), or Mean<br>(95%CI) age years) | CHC<br>Intervention<br>method; compound<br>(dose µg)<br>Duration<br>(prior use) | Comparison<br>Condition<br>(prior CHC<br>exposure) | Outcome<br>(method, unit)                                  | Group Results                                                                                                                                                                                        | Between Group<br>Comparison | DB Score<br>(0-32) |
|--------------------------------------|--------------------------------------------------------------------------------|---------------------------------------------------------------------------------|----------------------------------------------------|------------------------------------------------------------|------------------------------------------------------------------------------------------------------------------------------------------------------------------------------------------------------|-----------------------------|--------------------|
|                                      |                                                                                |                                                                                 |                                                    | tibial trabecular area 4%<br>site (HRpQCT) mm <sup>2</sup> | Mean pre-post (week 1 vs. week 14 vs. week 28 vs. week 44)<br>Never user: 962±110 vs. 961±110 vs. 959±109 vs. 957±110<br>Ongoing user: 947±127 vs. 946±127 vs. 945±127 vs. 944±128                   | p≥0.19                      |                    |
|                                      |                                                                                |                                                                                 |                                                    | tibial trabecular bone<br>volume 4% site (HRpQCT)<br>%     | Mean pre-post (week 1 vs. week 14 vs. week 28 vs. week 44)<br>Never user: 29.1±3.5 vs. 29.5±3.3 vs. 29.6±3.5 vs. 30.1±3.4<br>Ongoing user: 27.5±2.9 vs. 27.8±2.6 vs. 28.1±2.8 vs. 28.5 ± 2.5         | p≥0.19                      |                    |
|                                      |                                                                                |                                                                                 |                                                    | tibial cortical area 4% site<br>(HRpQCT) mm <sup>2</sup>   | Mean pre-post (week 1 vs. week 14 vs. week 28 vs. week 44)<br>Never user: 82±11 vs. 83±10 vs. 85±10 vs. 86±11<br>Ongoing user: 81±12 vs. 83±13 vs. 84±13 vs. 85±13                                   | p≥0.19                      |                    |
|                                      |                                                                                |                                                                                 |                                                    | tibial cortical thickness<br>4% site (HRpQCT) mm           | Mean pre-post (week 1 vs. week 14 vs. week 28 vs. week 44)<br>Never user: 0.71±0.11 vs. 0.72±0.10 vs. 0.72±0.09 vs. 0.74± 0.10<br>Ongoing user: 0.72±0.14 vs. 0.73±0.15 vs. 0.74±0.16 vs. 0.75± 0.16 | p≥0.19                      |                    |
|                                      |                                                                                |                                                                                 |                                                    | tibial cortical perimeter<br>4% site (HRpQCT) mm           | Mean pre-post (week 1 vs. week 14 vs. week 28 vs. week 44)<br>Never user: 129.7±7.7 vs. 129.5±7.5 vs. 131.6±8.8 vs. 130.9±8.2<br>Ongoing user: 127.7±8.4 vs. 127.6±8.3 vs. 128.6±9.2 vs. 127.7±8.6   | p≥0.19                      |                    |

| Author, year<br>(design,<br>country) | Participants<br>n (Mean±SD, Median<br>(min-max), or Mean<br>(95%CI) age years) | CHC<br>Intervention<br>method; compound<br>(dose µg)<br>Duration<br>(prior use) | Comparison<br>Condition<br>(prior CHC<br>exposure) | Outcome<br>(method, unit)                          | Group Results                                                                                                                                                                                                                                                                                      | Between Group<br>Comparison                                                                                                                                                                                                                                                      | DB Score<br>(0-32) |
|--------------------------------------|--------------------------------------------------------------------------------|---------------------------------------------------------------------------------|----------------------------------------------------|----------------------------------------------------|----------------------------------------------------------------------------------------------------------------------------------------------------------------------------------------------------------------------------------------------------------------------------------------------------|----------------------------------------------------------------------------------------------------------------------------------------------------------------------------------------------------------------------------------------------------------------------------------|--------------------|
|                                      |                                                                                |                                                                                 |                                                    | tibial trabecular thickness<br>4% site (HRpQCT) mm | Median (IQR) pre-post (week 1 vs. week 14 vs. week 28 vs. week 44)<br>Never user: 0.239 (0.230, 0.245) vs. 0.242 (0.231, 0.249) vs. 0.251 (0.237, 0.254) vs. 0.248 (0.234, 0.258)<br>Ongoing user: 0.230 (0.226, 0.244) vs. 0.231 (0.225, 0.240) vs. 0.237 (0.230, 0.257) vs. 0.238 (0.232, 0.251) | p≤0.05 contraception × time interaction<br>Trabecular thickness increased in COCP users from week 1 to week 28 (0.005 [95% CI, 0.002–0.009] mm, p=0.04 and week 44 (0.006 [95% CI, 0.004–0.009] mm, p=0.005, and from week 14 to week 28 (0.006 [95% CI, 0.002–0.010] mm, p=0.04 |                    |
|                                      |                                                                                |                                                                                 |                                                    | tibial trabecular number<br>4% site (HRpQCT) 1/mm  | Mean pre-post (week 1 vs. week 14 vs. week 28 vs. week 44)<br>Never user: 1.68±0.23 vs. 1.72±0.24 vs. 1.80±0.24 vs. 1.76±0.20<br>Ongoing user: 1.77±0.16 vs. 1.79±0.16 vs. 1.85±0.20 vs. 1.85±0.17                                                                                                 | p≥0.16                                                                                                                                                                                                                                                                           |                    |
|                                      |                                                                                |                                                                                 |                                                    | tibial trabecular spacing<br>4% site (HRpQCT) mm   | Median (IQR) pre-post (week 1 vs. week 14 vs. week 28 vs. week 44)<br>Never user: 0.554 (0.473, 0.593) vs. 0.544 (0.466, 0.591) vs. 0.520 (0.447, 0.567) vs. 0.509 (0.463, 0.560)<br>Ongoing user: 0.534 (0.474, 0.546) vs. 0.524 (0.483, 0.550) vs. 0.502 (0.452, 0.543) vs. 0.511 (0.463, 0.522) | p≥0.16                                                                                                                                                                                                                                                                           |                    |
|                                      |                                                                                |                                                                                 |                                                    | tibial cortical porosity 4%<br>site (HRpQCT) %     | Median (IQR) pre-post (week 1 vs. week 14 vs. week 28 vs. week 44)<br>Never user: 1.1 (0.9, 1.5) vs. 1.0 (1.0, 1.6) vs. 1.0 (0.8, 1.4) vs. 1.0 (1.0, 1.6)<br>Ongoing user: 1.0 (0.7, 1.2) vs. 1.1 (0.7, 1.3) vs. 0.9 (0.5, 1.3) vs. 1.1 (0.6, 1.4)                                                 | p≥0.70                                                                                                                                                                                                                                                                           |                    |

| Author, year<br>(design,<br>country) | Participants<br>n (Mean±SD, Median<br>(min-max), or Mean<br>(95%CI) age years) | CHC<br>Intervention<br>method; compound<br>(dose µg)<br>Duration<br>(prior use) | Comparison<br>Condition<br>(prior CHC<br>exposure) | Outcome<br>(method, unit)                                  | Group Results                                                                                                                                                                                                                                                                                                     | Between Group<br>Comparison                                                                                                                                                                                                               | DB Score<br>(0-32) |
|--------------------------------------|--------------------------------------------------------------------------------|---------------------------------------------------------------------------------|----------------------------------------------------|------------------------------------------------------------|-------------------------------------------------------------------------------------------------------------------------------------------------------------------------------------------------------------------------------------------------------------------------------------------------------------------|-------------------------------------------------------------------------------------------------------------------------------------------------------------------------------------------------------------------------------------------|--------------------|
|                                      |                                                                                |                                                                                 |                                                    | tibial cortical pore<br>diameter 4% site<br>(HRpQCT) mm    | Median (IQR) pre-post (week 1 vs. week 14 vs.<br>week 28 vs. week 44)<br>Never user: 0.173 (0.163, 0.182) vs. 0.177<br>(0.165, 0.185) vs. 0.168 (0.161, 0.176) vs.<br>0.167 (0.166, 0.185)<br>Ongoing user: 0.179 (0.168, 0.189) vs. 0.177<br>(0.169, 0.190) vs. 0.168 (0.158, 0.185) vs.<br>0.176 (0.164, 0.187) | p ≥ .161, training did not<br>change cortical pore<br>diameter size in any<br>contraceptive group<br>but was higher in nonusers<br>compared with COCP users<br>at week 1, and higher in<br>nonusers than COCP users<br>at week 28 p<0.024 |                    |
|                                      |                                                                                |                                                                                 |                                                    | total vBMD10 30% site<br>(HRpQCT) mg HA/cm <sup>3</sup>    | Mean pre-post (week 1 vs. week 14 vs. week<br>28 vs. week 44)<br>Never user: 786±42 vs. 780±43 vs. 787±35 vs.<br>789±41<br>Ongoing user: 779±46 vs. 778±49 vs. 784±45<br>vs. 783±47                                                                                                                               | p≥0.30                                                                                                                                                                                                                                    |                    |
|                                      |                                                                                |                                                                                 |                                                    | cortical vBMD10 30% site<br>(HRpQCT) mg HA/cm <sup>3</sup> | Mean pre-post (week 1 vs. week 14 vs. week<br>28 vs. week 44)<br>Never user: 1016±21 vs. 1014±20 vs. 1019±19<br>vs. 1025±19<br>Ongoing user: 1012±16 vs. 1009±17 vs.<br>1016±20 vs. 1019±27                                                                                                                       | p≥0.30                                                                                                                                                                                                                                    |                    |
|                                      |                                                                                |                                                                                 |                                                    | tibial cortical area 30%<br>site (HRpQCT) mm <sup>2</sup>  | Mean pre-post (week 1 vs. week 14 vs. week<br>28 vs. week 44)<br>Never user: 252±35 vs. 250±32 vs. 253±37 vs.<br>253±38<br>Ongoing user: 246±31 vs. 247±20 vs. 248±31<br>vs. 247±31                                                                                                                               | p≥0.19                                                                                                                                                                                                                                    |                    |

| Author, year<br>(design,<br>country) | Participants<br>n (Mean±SD, Median<br>(min-max), or Mean<br>(95%CI) age years) | CHC<br>Intervention<br>method; compound<br>(dose µg)<br>Duration<br>(prior use) | Comparison<br>Condition<br>(prior CHC<br>exposure) | Outcome<br>(method, unit)                                | Group Results                                                                                                                                                                                                                                                                                           | Between Group<br>Comparison | DB Score<br>(0-32) |
|--------------------------------------|--------------------------------------------------------------------------------|---------------------------------------------------------------------------------|----------------------------------------------------|----------------------------------------------------------|---------------------------------------------------------------------------------------------------------------------------------------------------------------------------------------------------------------------------------------------------------------------------------------------------------|-----------------------------|--------------------|
|                                      |                                                                                |                                                                                 |                                                    | tibial cortical thickness<br>30% site (HRpQCT) mm        | Mean pre-post (week 1 vs. week 14 vs. week 28 vs. week 44)<br>Never user: 5.67±0.58 vs. 5.64±0.54 vs. 5.69±0.63 vs. 5.69±0.63<br>Ongoing user: 5.58±0.45 vs. 5.62±0.46 vs. 5.60±0.45 vs. 5.60±0.45                                                                                                      | p≥0.19                      |                    |
|                                      |                                                                                |                                                                                 |                                                    | tibial cortical perimeter<br>30% site (HRpQCT) mm        | Mean pre-post (week 1 vs. week 14 vs. week 28 vs. week 44)<br>Never user: 73.3±5.1 vs. 72.5±4.9 vs. 73.9±5.3 vs. 73.8 ± 5.2<br>Ongoing user: 72.1±4.2 vs. 72.3 ± 4.2 vs. 72.6±4.3 vs. 72.5±3.9                                                                                                          | p≥0.19                      |                    |
|                                      |                                                                                |                                                                                 |                                                    | tibial cortical porosity<br>30% site (HRpQCT) %          | Median (IQR) pre-post (week 1 vs. week 14 vs. week 28 vs. week 44)<br>Never user: 0.7 (0.6, 1.1) vs. 0.6 (0.4, 0.9) vs. 0.6 (0.5, 1.1) vs. 0.6 (0.4, 1.0)<br>Ongoing user: 0.7 (0.4, 0.9) vs. 0.7 (0.5, 0.9) vs. 0.6 (0.4, 0.8) vs. 0.7 (0.3, 0.9)                                                      | p≤0.05                      |                    |
|                                      |                                                                                |                                                                                 |                                                    | tibial cortical pore<br>diameter 30% site<br>(HRpQCT) mm | Median (IQR) Mean pre-post (week 1 vs. week 14 vs. week 28 vs. week 44)<br>Never user: 0.270 (0.245, 0.361) vs. 0.223 (0.201, 0.280) vs. 0.243 (0.220, 0.321) vs. 0.228 (0.205, 0.256)<br>Ongoing user: 0.223 (0.210, 0.235) vs. 0.218 (0.179, 0.244) vs. 0.208 (0.190, 0.216) vs. 0.208 (0.180, 0.229) | p≤0.05                      |                    |

| Author, year<br>(design,<br>country) | Participants<br>n (Mean±SD, Median<br>(min-max), or Mean<br>(95%CI) age years) | CHC<br>Intervention<br>method; compound<br>(dose µg)<br>Duration<br>(prior use) | Comparison<br>Condition<br>(prior CHC<br>exposure) | Outcome<br>(method, unit)                                                 | Group Results                                                                                                                                                                                               | Between Group<br>Comparison | DB Score<br>(0-32) |
|--------------------------------------|--------------------------------------------------------------------------------|---------------------------------------------------------------------------------|----------------------------------------------------|---------------------------------------------------------------------------|-------------------------------------------------------------------------------------------------------------------------------------------------------------------------------------------------------------|-----------------------------|--------------------|
|                                      |                                                                                |                                                                                 |                                                    | tibial failure load under<br>uniaxial compression<br>4% site (HRpQCT) kN  | Mean pre-post (week 1 vs. week 14 vs. week<br>28 vs. week 44)<br>Never user: 10.3±2.0 vs. 10.4±1.8 vs. 9.9±1.8<br>vs. 10.3±1.9<br>Ongoing user: 8.9±2.2 vs. 9.1±1.9 vs. 9.1±2.2<br>vs. 9.2±1.6              | p≥0.17                      |                    |
|                                      |                                                                                |                                                                                 |                                                    | tibial stiffness 4% site<br>(HRpQCT) kN/mm                                | Mean pre-post (week 1 vs. week 14 vs. week<br>28 vs. week 44)<br>Never user: 191±36 vs. 191±36 vs. 182±35 vs.<br>190±39<br>Ongoing user: 163±42 vs. 166±37 vs. 159±32<br>vs. 169±32                         | p≥0.17                      |                    |
|                                      |                                                                                |                                                                                 |                                                    | tibial failure load under<br>uniaxial compression<br>30% site (HRpQCT) kN | Mean pre-post (week 1 vs. week 14 vs. week<br>28 vs. week 44)<br>Never user: 14.9±2.1 vs. 15.1±1.7 vs. 15.4±2.2<br>vs. 15.4±2.2<br>Ongoing user: 14.6±1.7 vs. 14.7±1.7 vs.<br>14.9±1.6 vs. 14.9±1.7         | p≥0.17                      |                    |
|                                      |                                                                                |                                                                                 |                                                    | tibial stiffness 30% site<br>(HRpQCT) kN/mm                               | Mean pre-post (week 1 vs. week 14 vs. week<br>28 vs. week 44)<br>Never user: 266±39 vs. 267±38 vs. 273±41 vs.<br>274±40<br>Ongoing user: 259±33 vs. 261±32 vs. 263±32<br>vs. 258±36                         | p≥0.17                      |                    |
|                                      |                                                                                |                                                                                 |                                                    | aBMD arms (DXA)<br>g/cm <sup>2</sup>                                      | Mean pre-post (week 1 vs. week 14 vs. week<br>28 vs. week 44)<br>Never user: 0.87±0.11 vs. 0.89±0.11 vs.<br>0.92±0.08 vs. 0.85±0.12<br>Ongoing user: 0.88±0.09 vs. 0.88±0.10 vs.<br>0.84±0.12 vs. 0.78±0.13 | p≥0.11                      |                    |



| Author, year<br>(design,<br>country) | Participants<br>n (Mean±SD, Median<br>(min-max), or Mean<br>(95%CI) age years) | CHC<br>Intervention<br>method; compound<br>(dose µg)<br>Duration<br>(prior use) | Comparison<br>Condition<br>(prior CHC<br>exposure) | Outcome<br>(method, unit)           | Group Results                                                                                                                                                                                      | Between Group<br>Comparison | DB Score<br>(0-32) |
|--------------------------------------|--------------------------------------------------------------------------------|---------------------------------------------------------------------------------|----------------------------------------------------|-------------------------------------|----------------------------------------------------------------------------------------------------------------------------------------------------------------------------------------------------|-----------------------------|--------------------|
|                                      |                                                                                |                                                                                 |                                                    | aBMD legs (DXA) g/cm <sup>2</sup>   | Mean pre-post (week 1 vs. week 14 vs. week 28 vs. week 44)<br>Never user: 1.24±0.10 vs. 1.24±0.08 vs. 1.23±0.07 vs. 1.24±0.07<br>Ongoing user: 1.25±0.08 vs. 1.25±0.10 vs. 1.24±0.08 vs. 1.24±0.09 | p≥0.11                      |                    |
|                                      |                                                                                |                                                                                 |                                                    | aBMD trunk (DXA) g/cm <sup>2</sup>  | Mean pre-post (week 1 vs. week 14 vs. week 28 vs. week 44)<br>Never user: 1.02±0.06 vs. 1.02±0.06 vs. 1.02±0.06 vs. 1.02±0.06<br>Ongoing user: 1.02±0.10 vs. 1.02±0.10 vs. 1.02±0.10 vs. 1.02±0.10 | p≥0.11                      |                    |
|                                      |                                                                                |                                                                                 |                                                    | aBMD ribs (DXA) g/cm <sup>2</sup>   | Mean pre-post (week 1 vs. week 14 vs. week 28 vs. week 44)<br>Never user: 0.87±0.06 vs. 0.86±0.06 vs. 0.88±0.05 vs. 0.87±0.05<br>Ongoing user: 0.87±0.07 vs. 0.86±0.08 vs. 0.86±0.08 vs. 0.87±0.08 | p≥0.11                      |                    |
|                                      |                                                                                |                                                                                 |                                                    | aBMD pelvis (DXA) g/cm <sup>2</sup> | Mean pre-post (week 1 vs. week 14 vs. week 28 vs. week 44)<br>Never user: 1.08±0.07 vs. 1.10±0.07 vs. 1.09±0.07 vs. 1.10±0.07<br>Ongoing user: 1.11±0.14 vs. 1.11±0.13 vs. 1.12±0.13 vs. 1.11±0.12 | p≥0.11                      |                    |
|                                      |                                                                                |                                                                                 |                                                    | aBMD spine (DXA) g/cm <sup>2</sup>  | Mean pre-post (week 1 vs. week 14 vs. week 28 vs. week 44)<br>Never user: 1.11±0.09 vs. 1.13±0.09 vs. 1.12±0.08 vs. 1.12±0.10<br>Ongoing user: 1.09±0.11 vs. 1.10±0.10 vs. 1.10±0.09 vs. 1.08±0.11 | p≥0.11                      |                    |

| Author, year<br>(design,<br>country) | Participants<br>n (Mean±SD, Median<br>(min-max), or Mean<br>(95%CI) age years) | CHC<br>Intervention<br>method; compound<br>(dose µg)<br>Duration<br>(prior use) | Comparison<br>Condition<br>(prior CHC<br>exposure) | Outcome<br>(method, unit)                                                | Group Results                                                                                                                                                                                                       | Between Group<br>Comparison                                                                                                                                                                                           | DB Score<br>(0-32) |
|--------------------------------------|--------------------------------------------------------------------------------|---------------------------------------------------------------------------------|----------------------------------------------------|--------------------------------------------------------------------------|---------------------------------------------------------------------------------------------------------------------------------------------------------------------------------------------------------------------|-----------------------------------------------------------------------------------------------------------------------------------------------------------------------------------------------------------------------|--------------------|
|                                      |                                                                                |                                                                                 |                                                    | aBMD whole body (DXA)<br>g/cm <sup>2</sup>                               | Mean pre-post (week 1 vs. week 14 vs. week 28 vs. week 44)<br>Never user: 1.21±0.08 vs. 1.21±0.07 vs. 1.21±0.06 vs. 1.20±0.07<br>Ongoing user: 1.22±0.09 vs. 1.22±0.10 vs. 1.21±0.10 vs. 1.19±0.10                  | p≥0.11                                                                                                                                                                                                                |                    |
|                                      |                                                                                |                                                                                 |                                                    | Bone-specific alkaline<br>phosphatase ALP<br>(serum biomarker)<br>µg/L-1 | Median (IQR) pre-post (week 1 vs. week 28 vs. week 44)<br>Never user: 19.1 (17.7, 21.7) vs. 20.4 (16.4, 24.2) vs. 21.0 (15.9, 26.4)<br>Ongoing user: 18.1 (15.6, 18.7) vs. 18.4 (17.6, 22.2) vs. 20.1 (16.7, 24.4)  | p≥0.05                                                                                                                                                                                                                |                    |
|                                      |                                                                                |                                                                                 |                                                    | Sclerostin (serum<br>biomarker) pmol/L-1                                 | Median (IQR) pre-post (week 1 vs. week 28 vs. week 44)<br>Never user: 36.7 (31.5, 39.6) vs. 35.0 (32.1, 43.4) vs. 36.9 (29.0, 45.4)<br>Ongoing user: 33.0 (28.9, 40.6) vs. 36.9 (31.3, 47.9) vs. 30.8 (27.8, 41.7)  | p≥0.05                                                                                                                                                                                                                |                    |
|                                      |                                                                                |                                                                                 |                                                    | P1NP (plasma) µg/L-1                                                     | Median (IQR) pre-post (week 1 vs. week 28 vs. week 44)<br>Never user: 68.2 (58.1, 84.9) vs. 84.4 (63.7, 105.1) vs. 73.7 (64.6, 80.3)<br>Ongoing user: 61.3 (50.5, 77.5) vs. 65.9 (54.6, 93.5) vs. 67.7 (57.1, 79.4) | p< 0.05 contraception ×<br>time interaction<br>P1NP was higher in<br>progestin only<br>contraceptive users than<br>CHC users at week 1<br>p=0.01, d (1.022)<br>No interaction for CHC vs<br>nonusers of contraception |                    |
|                                      |                                                                                |                                                                                 |                                                    | β-CTX (plasma) µg/L-1                                                    | Median (IQR) pre-post (week 1 vs. week 28 vs. week 44)<br>Never user: 0.55 (0.42, 0.59) vs. 0.53 (0.36, 0.60) vs. 0.55 (0.44, 0.66)<br>Ongoing user: 0.49 (0.38, 0.59) vs. 0.43 (0.33, 0.60) vs. 0.49 (0.40, 0.59)  | p≥.053                                                                                                                                                                                                                |                    |

| Author, year<br>(design,<br>country) | Participants<br>n (Mean±SD, Median<br>(min-max), or Mean<br>(95%CI) age years) | CHC<br>Intervention<br>method; compound<br>(dose µg)<br>Duration<br>(prior use) | Comparison<br>Condition<br>(prior CHC<br>exposure) | Outcome<br>(method, unit)                                 | Group Results                                                                                                                                               | Between Group<br>Comparison | DB Score<br>(0-32) |
|--------------------------------------|--------------------------------------------------------------------------------|---------------------------------------------------------------------------------|----------------------------------------------------|-----------------------------------------------------------|-------------------------------------------------------------------------------------------------------------------------------------------------------------|-----------------------------|--------------------|
|                                      |                                                                                |                                                                                 |                                                    | Phosphate (serum<br>biomarker) nmol/L-1                   | Mean pre-post (week 1 vs. week 28 vs. week 44)<br>Never user: 1.59±0.18 vs. 1.62±0.17 vs. 1.63±0.16<br>Ongoing user: 1.56±0.10 vs. 1.53±0.23 vs. 1.55±0.14  | p≥0.05                      |                    |
|                                      |                                                                                |                                                                                 |                                                    | Albumin-adjusted<br>calcium (serum<br>biomarker) nmol/L-1 | Mean pre-post (week 1 vs. week 28 vs. week 44)<br>Never user: 2.48±0.12 vs. 2.50±0.07 vs. 2.57±0.12<br>Ongoing user: 2.48±0.10 vs. 2.55±0.09 vs. 2.53±0.11a | p≥0.05                      |                    |
|                                      |                                                                                |                                                                                 |                                                    | Total 25(OH)D (serum<br>biomarker) nmol/L-1               | Mean pre-post (week 1 vs. week 28 vs. week 44)<br>Never user: 57.0±16.7 vs. 69.7±20.8 vs. 53.9±14.8<br>Ongoing user: 77.9±31.0 vs. 79.4±24.9 vs. 70.5±19.8  | p≥0.05                      |                    |

\*Mean and standard error

aBMD (areal bone mineral density), ALP (alkaline phosphatase), BAP (Bone Alkaline Phosphatase), BGP (Osteocalcin), BMC (bone mineral content), BMD (bone mineral density), CA (cyproterone acetate), CHC+ (CHC user), CHC- (CHC nonuser), CTX (C-terminal peptide), DEN (Denmark), DG (desogestrel), DGn (desogestren), DP (drospirenone), D-PYD (Deoxy pyridinoline), EE2 (ethinyl E2), ET (etonogestrel), FSR (fractional synthesis rate), GD (gestoden/gestodene), GER (Germany), HRpQCT (high-resolution peripheral quantitative computed tomography), LNG (levonorgestrel), MRI (Magnetic Resonance Imaging), NG (norgestrel), NGMN (norelgestromin), NO (norethindrone), NOR (Norway), NR (Not reported), PG (progesterone), PYD (Pyridinoline), RCT (randomized controlled trial), UK (United Kingdom), USA (United States of America), vBMD (volumetric bone mineral density)

## 4. Downs and Black Quality Assessment Tool Ratings

| Study Year                                | Reporting |      |      |      |      |      |      |      |      |      | External validity |      |      |     | Internal validity – Bias |      |      |      |      | Internal validity –confounding |      |      |      |     | Power | Total (0-32) |       |    |
|-------------------------------------------|-----------|------|------|------|------|------|------|------|------|------|-------------------|------|------|-----|--------------------------|------|------|------|------|--------------------------------|------|------|------|-----|-------|--------------|-------|----|
|                                           | 1         | 2    | 3    | 4    | 5    | 6    | 7    | 8    | 9    | 10   | 11                | 12   | 13   | 14  | 15                       | 16   | 17   | 18   | 19   | 20                             | 21   | 22   | 23   | 24  |       |              | 25    | 26 |
| Hansen 1991                               | 1         | 1    | 1    | 0    | 1    | 1    | 1    | 0    | 0    | 1    | 0                 | 0    | 0    | 0   | 0                        | 0    | 1    | 0    | 0    | 0                              | 0    | 0    | 0    | 1   | 1     | 0            | 10    |    |
| Mazess 1991                               | 0         | 1    | 1    | 0    | 2    | 1    | 1    | 0    | 0    | 0    | 0                 | 0    | 0    | 0   | 0                        | 0    | 0    | 0    | 0    | 0                              | 1    | 1    | 0    | 0   | 0     | 0            | 8     |    |
| Cooper 1993                               | 1         | 1    | 0    | 0    | 0    | 1    | 1    | 0    | 1    | 0    | 0                 | 0    | 0    | 0   | 1                        | 1    | 1    | 0    | 1    | 1                              | 1    | 0    | 0    | 1   | 1     | 5            | 18    |    |
| Vessey 1998                               | 0         | 1    | 0    | 0    | 0    | 1    | 1    | 0    | 0    | 1    | 1                 | 1    | 0    | 0   | 0                        | 1    | 0    | 0    | 0    | 1                              | 1    | 0    | 0    | 0   | 1     | 0            | 10    |    |
| Vessey 1999                               | 0         | 1    | 0    | 0    | 0    | 1    | 1    | 0    | 0    | 0    | 1                 | 1    | 0    | 0   | 0                        | 1    | 0    | 0    | 1    | 1                              | 1    | 0    | 0    | 0   | 1     | 0            | 10    |    |
| Weaver 2001                               | 1         | 0    | 1    | 1    | 1    | 1    | 1    | 0    | 0    | 1    | 0                 | 0    | 0    | 0   | 0                        | 0    | 1    | 1    | 1    | 0                              | 0    | 1    | 0    | 0   | 1     | 0            | 12    |    |
| Cobb 2002                                 | 1         | 1    | 1    | 0    | 1    | 1    | 1    | 0    | 0    | 1    | 1                 | 0    | 0    | 0   | 1                        | 1    | 1    | 0    | 1    | 1                              | 1    | 0    | 0    | 1   | 1     | 0            | 16    |    |
| Elgan 2003                                | 1         | 1    | 1    | 0    | 2    | 1    | 1    | 0    | 0    | 1    | 0                 | 0    | 0    | 0   | 1                        | 0    | 1    | 0    | 1    | 1                              | 1    | 0    | 0    | 1   | 0     | 0            | 14    |    |
| Nappi 2003                                | 1         | 1    | 1    | 1    | 1    | 1    | 1    | 1    | 0    | 0    | 0                 | 1    | 0    | 1   | 1                        | 0    | 1    | 0    | 0    | 1                              | 1    | 1    | 0    | 0   | 1     | 0            | 16    |    |
| Reed 2003                                 | 1         | 1    | 1    | 0    | 1    | 1    | 1    | 0    | 0    | 1    | 1                 | 0    | 0    | 0   | 1                        | 1    | 0    | 0    | 1    | 1                              | 1    | 0    | 0    | 1   | 1     | 1            | 16    |    |
| Berenson 2004                             | 1         | 1    | 1    | 0    | 1    | 1    | 1    | 0    | 0    | 1    | 0                 | 0    | 1    | 1   | 0                        | 1    | 1    | 0    | 1    | 1                              | 1    | 1    | 0    | 1   | 1     | 0            | 18    |    |
| Elgan 2004                                | 1         | 1    | 1    | 0    | 2    | 1    | 1    | 0    | 0    | 1    | 0                 | 0    | 0    | 0   | 1                        | 0    | 1    | 0    | 0    | 1                              | 1    | 0    | 0    | 1   | 1     | 0            | 14    |    |
| Rome 2004                                 | 1         | 1    | 1    | 0    | 1    | 1    | 0    | 0    | 0    | 1    | 1                 | 1    | 0    | 0   | 1                        | 1    | 1    | 0    | 1    | 1                              | 0    | 0    | 0    | 1   | 0     | 0            | 13    |    |
| Barad 2005                                | 1         | 1    | 1    | 0    | 1    | 1    | 1    | 0    | 0    | 1    | 1                 | 1    | 0    | 0   | 0                        | 1    | 1    | 0    | 1    | 1                              | 1    | 0    | 0    | 1   | 1     | 3            | 19    |    |
| Massai 2005                               | 1         | 1    | 1    | 1    | 0    | 1    | 1    | 1    | 0    | 1    | 0                 | 0    | 1    | 0   | 0                        | 1    | 0    | 1    | 0    | 1                              | 0    | 0    | 0    | 0   | 1     | 1            | 14    |    |
| Nappi 2005                                | 1         | 1    | 1    | 1    | 1    | 1    | 1    | 1    | 0    | 0    | 1                 | 1    | 1    | 0   | 1                        | 1    | 0    | 1    | 1    | 1                              | 1    | 1    | 1    | 0   | 0     | 4            | 24    |    |
| Hartard 2006                              | 1         | 1    | 1    | 1    | 2    | 1    | 1    | 0    | 0    | 0    | 0                 | 0    | 0    | 0   | 0                        | 1    | 1    | 0    | 0    | 0                              | 0    | 1    | 0    | 0   | 1     | 0            | 12    |    |
| Cobb 2007                                 | 1         | 1    | 1    | 1    | 2    | 1    | 1    | 1    | 1    | 0    | 0                 | 0    | 1    | 0   | 0                        | 1    | 1    | 1    | 1    | 1                              | 1    | 1    | 0    | 1   | 1     | 1            | 21    |    |
| Kelsey 2007                               | 1         | 1    | 1    | 0    | 2    | 1    | 1    | 0    | 1    | 1    | 0                 | 0    | 0    | 0   | 0                        | 1    | 1    | 0    | 0    | 1                              | 1    | 0    | 0    | 1   | 1     | 0            | 15    |    |
| Berenson 2008                             | 1         | 1    | 1    | 1    | 2    | 0    | 0    | 0    | 1    | 1    | 1                 | 1    | 1    | 0   | 0                        | 1    | 1    | 0    | 1    | 1                              | 1    | 0    | 0    | 1   | 1     | 1            | 20    |    |
| Cromer 2008                               | 1         | 1    | 1    | 0    | 2    | 1    | 1    | 0    | 1    | 1    | 0                 | 0    | 0    | 0   | 1                        | 1    | 1    | 0    | 1    | 1                              | 1    | 0    | 0    | 1   | 1     | 0            | 17    |    |
| Gargano 2008                              | 1         | 1    | 1    | 1    | 1    | 1    | 1    | 1    | 0    | 0    | 0                 | 1    | 0    | 0   | 1                        | 0    | 0    | 0    | 0    | 0                              | 0    | 1    | 1    | 1   | 0     | 0            | 13    |    |
| Liederbach 2008                           | 1         | 1    | 0    | 0    | 0    | 1    | 1    | 0    | 0    | 1    | 1                 | 0    | 0    | 0   | 1                        | 1    | 0    | 0    | 1    | 1                              | 1    | 0    | 0    | 1   | 0     | 0            | 14    |    |
| Procter-Gray 2008                         | 1         | 1    | 1    | 1    | 2    | 1    | 1    | 1    | 0    | 1    | 1                 | 1    | 0    | 0   | 1                        | 0    | 1    | 1    | 1    | 1                              | 1    | 1    | 1    | 0   | 1     | 0            | 22    |    |
| Beksinska 2009                            | 1         | 1    | 1    | 0    | 1    | 1    | 1    | 0    | 0    | 1    | 0                 | 0    | 0    | 0   | 0                        | 1    | 1    | 1    | 0    | 1                              | 1    | 1    | 0    | 0   | 1     | 1            | 17    |    |
| Bonny 2009                                | 1         | 1    | 1    | 0    | 1    | 1    | 1    | 0    | 0    | 1    | 0                 | 0    | 0    | 0   | 0                        | 1    | 1    | 1    | 1    | 0                              | 1    | 1    | 0    | 0   | 1     | 0            | 14    |    |
| Liu 2009                                  | 1         | 1    | 1    | 0    | 1    | 1    | 1    | 0    | 0    | 1    | 1                 | 1    | 0    | 0   | 0                        | 1    | 1    | 1    | 0    | 1                              | 1    | 1    | 0    | 0   | 1     | 1            | 18    |    |
| Massaro 2010                              | 1         | 1    | 1    | 1    | 1    | 1    | 1    | 1    | 0    | 0    | 1                 | 1    | 1    | 0   | 1                        | 1    | 0    | 1    | 0    | 0                              | 1    | 1    | 1    | 0   | 0     | 0            | 17    |    |
| Liu 2011                                  | 1         | 1    | 1    | 1    | 1    | 1    | 1    | 1    | 0    | 1    | 0                 | 1    | 1    | 0   | 0                        | 1    | 0    | 1    | 1    | 0                              | 1    | 0    | 1    | 0   | 0     | 1            | 0     | 17 |
| Scholes 2011                              | 1         | 1    | 1    | 0    | 2    | 1    | 1    | 0    | 0    | 0    | 1                 | 1    | 0    | 0   | 0                        | 1    | 1    | 1    | 0    | 1                              | 1    | 1    | 0    | 0   | 1     | 1            | 0     | 17 |
| Gai 2012                                  | 1         | 1    | 1    | 1    | 2    | 1    | 1    | 1    | 0    | 1    | 0                 | 0    | 1    | 0   | 0                        | 0    | 0    | 1    | 0    | 0                              | 1    | 0    | 1    | 0   | 0     | 1            | 0     | 15 |
| Biason 2015                               | 1         | 1    | 0    | 0    | 1    | 1    | 1    | 0    | 0    | 1    | 0                 | 0    | 1    | 0   | 0                        | 1    | 1    | 0    | 0    | 1                              | 1    | 1    | 0    | 0   | 0     | 1            | 1     | 15 |
| Lee 2015                                  | 1         | 1    | 1    | 0    | 0    | 1    | 1    | 0    | 1    | 1    | 0                 | 0    | 0    | 0   | 0                        | 0    | 1    | 0    | 0    | 1                              | 1    | 0    | 0    | 0   | 0     | 1            | 0     | 12 |
| Gersten 2016                              | 1         | 1    | 1    | 1    | 2    | 1    | 1    | 1    | 0    | 1    | 0                 | 0    | 1    | 0   | 1                        | 0    | 1    | 1    | 1    | 0                              | 1    | 1    | 1    | 0   | 1     | 1            | 3     | 23 |
| Jackowski 2016                            | 1         | 1    | 1    | 0    | 2    | 1    | 1    | 0    | 0    | 0    | 1                 | 0    | 0    | 0   | 0                        | 0    | 1    | 1    | 0    | 1                              | 1    | 0    | 0    | 1   | 1     | 0            | 15    |    |
| Reiger 2016                               | 1         | 1    | 1    | 1    | 1    | 1    | 1    | 0    | 0    | 1    | 0                 | 0    | 0    | 0   | 0                        | 1    | 0    | 1    | 1    | 1                              | 1    | 0    | 0    | 0   | 0     | 0            | 0     | 12 |
| Hellevik 2017                             | 1         | 1    | 1    | 0    | 2    | 1    | 1    | 0    | 0    | 1    | 0                 | 0    | 0    | 0   | 0                        | 0    | 1    | 1    | 0    | 1                              | 0    | 0    | 0    | 0   | 1     | 1            | 5     | 18 |
| Brajić 2018                               | 1         | 1    | 1    | 0    | 2    | 1    | 1    | 0    | 1    | 1    | 1                 | 1    | 0    | 0   | 1                        | 0    | 1    | 0    | 1    | 1                              | 1    | 0    | 0    | 1   | 1     | 0            | 18    |    |
| Dalgaard 2019                             | 1         | 1    | 1    | 0    | 1    | 1    | 1    | 0    | 1    | 1    | 0                 | 0    | 0    | 0   | 0                        | 1    | 1    | 1    | 0    | 0                              | 1    | 1    | 1    | 0   | 0     | 0            | 15    |    |
| Leung 2019                                | 0         | 1    | 1    | 0    | 1    | 1    | 1    | 0    | 0    | 1    | 0                 | 0    | 0    | 0   | 0                        | 0    | 1    | 1    | 0    | 1                              | 1    | 1    | 0    | 0   | 1     | 1            | 5     | 18 |
| Allaway 2020                              | 1         | 1    | 1    | 1    | 1    | 1    | 1    | 1    | 0    | 1    | 0                 | 0    | 0    | 0   | 0                        | 1    | 1    | 1    | 1    | 0                              | 1    | 0    | 0    | 0   | 0     | 1            | 0     | 15 |
| Almstedt 2020                             | 1         | 1    | 1    | 0    | 2    | 0    | 1    | 0    | 0    | 1    | 0                 | 0    | 0    | 0   | 0                        | 1    | 1    | 1    | 0    | 1                              | 1    | 0    | 0    | 0   | 1     | 0            | 0     | 13 |
| Dalgaard 2020                             | 1         | 1    | 1    | 0    | 2    | 1    | 1    | 0    | 1    | 1    | 0                 | 1    | 0    | 0   | 0                        | 0    | 1    | 1    | 0    | 1                              | 1    | 0    | 0    | 0   | 0     | 1            | 1     | 16 |
| Herzog 2020                               | 1         | 1    | 0    | 0    | 0    | 1    | 1    | 0    | 0    | 1    | 1                 | 1    | 0    | 0   | 0                        | 0    | 1    | 1    | 0    | 1                              | 1    | 1    | 0    | 0   | 1     | 1            | 5     | 19 |
| Oxfeldt 2020                              | 1         | 1    | 0    | 0    | 0    | 1    | 1    | 0    | 0    | 1    | 0                 | 0    | 0    | 0   | 0                        | 1    | 1    | 1    | 0    | 1                              | 1    | 0    | 0    | 0   | 0     | 0            | 0     | 10 |
| Martin 2021                               | 1         | 1    | 0    | 0    | 0    | 1    | 1    | 0    | 0    | 1    | 0                 | 0    | 0    | 0   | 0                        | 1    | 1    | 0    | 0    | 1                              | 0    | 0    | 0    | 0   | 0     | 0            | 0     | 8  |
| O'Leary 2021                              | 0         | 1    | 1    | 0    | 1    | 1    | 1    | 0    | 1    | 0    | 0                 | 1    | 0    | 0   | 0                        | 0    | 1    | 1    | 0    | 1                              | 1    | 1    | 0    | 0   | 0     | 0            | 3     | 15 |
| Yoo 2021                                  | 1         | 1    | 1    | 0    | 2    | 1    | 1    | 0    | 0    | 1    | 1                 | 1    | 0    | 0   | 0                        | 1    | 1    | 1    | 0    | 1                              | 1    | 1    | 0    | 0   | 1     | 1            | 5     | 23 |
| He 2022                                   | 1         | 1    | 1    | 0    | 2    | 0    | 0    | 0    | 0    | 0    | 0                 | 0    | 0    | 0   | 0                        | 1    | 1    | 1    | 0    | 1                              | 1    | 1    | 0    | 0   | 0     | 1            | 0     | 12 |
| Sung 2022                                 | 1         | 1    | 0    | 0    | 0    | 1    | 1    | 0    | 0    | 1    | 0                 | 0    | 0    | 0   | 0                        | 1    | 1    | 0    | 0    | 1                              | 1    | 0    | 0    | 0   | 0     | 0            | 0     | 9  |
| Proportion fully meeting (%) <sup>1</sup> | 90.0      | 98.0 | 82.0 | 30.0 | 38.0 | 94.0 | 94.0 | 22.0 | 20.0 | 72.0 | 34.0              | 34.0 | 24.0 | 2.0 | 14.0                     | 60.0 | 72.0 | 84.0 | 18.0 | 72.0                           | 84.0 | 68.0 | 24.0 | 4.0 | 52.0  | 74.0         | 34.0* |    |

<sup>1</sup>For item 5, score of 2 is fully meeting, all others 1 is fully meeting, \*proportion of scores ≥1, blue columns are applicable to intervention studies only.

## 5.Semi-quantitative Analyses

| Outcome          | Author, Year   | Age Range       | Follow Up | Sample Size     | Comparison                                                  | Between Group Estimate                                         | Study Design | Study Limitations <sup>†</sup> | Inconsistency <sup>‡</sup> | Indirectness | Imprecision          | Modified GRADE Rating |
|------------------|----------------|-----------------|-----------|-----------------|-------------------------------------------------------------|----------------------------------------------------------------|--------------|--------------------------------|----------------------------|--------------|----------------------|-----------------------|
| Lumbar Spine BMD | Berenson 2008  | 16-33           | 36-months | 128             | new vs non-user                                             | p<0.001                                                        | PC           | Not serious                    |                            |              | unclear              |                       |
|                  | Brajic 2018    | 16-24           | 12-months | 307             | ongoing vs non-user                                         | 0.002 (-0.104, 0.091)                                          | PC           | Serious                        |                            |              | Precise              |                       |
|                  | Cobb 2002      | 18-30           | ?         | 476             | past vs non-user                                            | -0.000005 ± 0.0002                                             | RC           | Not Serious                    |                            |              | Precise              |                       |
|                  | Cobb 2007      | 18-26           | 24-months | 150             | new vs non-user                                             | 0.0020±0.0025                                                  | RCT          | Very Serious                   |                            |              | Precise              |                       |
|                  | Hartard 2006   | 18-24           | 12-months | 59              | ongoing vs non-user                                         | CHC A: d=-0.85 (-1.51, -0.19)<br>CHC B: d=-0.20 (-0.84, 0.45)  | Quasi        | Very Serious                   |                            |              | Precise              |                       |
|                  | Jackowski 2016 | 8-33            | 20-years  | 110             | ongoing vs non-user                                         | NS                                                             | RC           | Serious                        |                            |              | unclear              |                       |
|                  | Massai 2005    | 18-35           | 24-months | 107             | ongoing vs non-user                                         | -0.341 (-0.473, -0.208)                                        | Quasi        | Very Serious                   |                            |              | precise              |                       |
|                  | Mazess 1991    | 20-39           | 12-months | 300             | ongoing vs non-user                                         | d= 0.08 (-0.25, 0.40)                                          | PC           | Very Serious                   |                            |              | Precise              |                       |
|                  | Nappi 2003     | 22-34           | 12-months | 56              | new vs non-user                                             | NS                                                             | Quasi        | Very Serious                   |                            |              | unclear              |                       |
|                  | Reed 2003      | 18-39           | 36-months | 178             | ongoing vs non-user                                         | p=0.73                                                         | PC           | Not Serious                    |                            |              | unclear              |                       |
|                  | Rome 2004      | 12-18           | 12-months | 317             | new vs non-user                                             | NR                                                             | PC           | Very Serious                   |                            |              | unclear              |                       |
|                  | Scholes 2011   | 14-30           | 36-months | 139             | ongoing vs non-user                                         | NS                                                             | PC           | Not serious                    |                            |              | unclear              |                       |
|                  | Weaver 2001    | 18-31           | ?         | 141             | ongoing vs non-user                                         | NS                                                             | RCT          | Very Serious                   | Consistent                 | Indirect     | unclear              | Very Low              |
|                  | Hansen 1991    | post menopausal | 12-years  | 121             | previous vs non-user                                        | NS                                                             | PC           | Very Serious                   |                            |              | unclear              |                       |
|                  | Berenson 2004  | 18-33           | 24-months | 111             | new vs non-user                                             | CHC A: 0.67 (-1.54, 2.88)<br>CHC B: 1.51 (-0.40, 3.42)         | Quasi        | Very Serious                   |                            |              | unclear<br>imprecise |                       |
|                  | Biason 2015    | 12-19           | 12-months | 61              | new vs non-user                                             | 0.101                                                          | Quasi        | Very Serious                   |                            |              | unclear              |                       |
|                  | Cromer 2008    | 12-18           | 24-months | 157             | new vs non-user                                             | NR                                                             | PC           | Not Serious                    |                            |              | unclear              |                       |
|                  | Gai 2012       | 16-18           | 24-months | 376             | new vs non-user                                             | CHC A: d= -0.09 (-0.33, 0.14)<br>CHC B: d= -0.07 (-0.30, 0.17) | Quasi        | Very Serious                   |                            |              | Precise              |                       |
|                  | Gargano 2008   | 21-34           | 12-months | 61              | new vs non-user                                             | CHC A: d= -0.01 (-0.62, 0.59)<br>CHC B: d= -0.02 (-0.61, 0.58) | Quasi        | Very Serious                   |                            |              | Imprecise            |                       |
|                  | Gersten 2016   | 12-18           | 12-months | 859             | new vs non-user                                             | CHC A: 0.23 (-0.20, 0.67)<br>CHC B: 1.05 (0.61, 1.49)          | Quasi        | Very Serious                   |                            |              | precise              |                       |
| Liu 2011         | 25-40          | 24-months       | 154       | new vs non-user | CHC A: d=-0.02 (-0.41, 0.38)<br>CHC B: d=0.02 (-0.36, 0.40) | Quasi                                                          | Very Serious |                                |                            | precise      |                      |                       |
| Massaro 2010     | 23-34          | 12-months       | 49        | new vs non-user | NS                                                          | Quasi                                                          | Very Serious |                                |                            | unclear      |                      |                       |

|                  | Nappi 2005     | 22-34           | 12-months | 67          | new vs non-user      | NS                                                            | Quasi                 | Very Serious           |                        |           |           |           |          |         |
|------------------|----------------|-----------------|-----------|-------------|----------------------|---------------------------------------------------------------|-----------------------|------------------------|------------------------|-----------|-----------|-----------|----------|---------|
|                  | <b>Overall</b> |                 |           | <b>4484</b> |                      |                                                               | <b>Mod Quality +3</b> | <b>Very Serious -2</b> | <b>0</b>               | <b>-1</b> | <b>-1</b> | <b>-2</b> |          |         |
|                  | Berenson 2008  | 16-33           | 36-months | 128         | new vs non-user      | p<0.001                                                       | PC                    | Not serious            |                        |           |           |           | unclear  |         |
|                  | Brajic 2018    | 16-24           | 24-months | 307         | ongoing vs non-user  | -0.001 (-0.010, 0.008)                                        | PC                    | Serious                |                        |           |           |           | precise  |         |
|                  | Cromer 2008    | 12-18           | 24-months | 157         | new vs non-user      | NR                                                            | PC                    | Not Serious            |                        |           |           |           | unclear  |         |
|                  | Gai 2012       | 16-18           | 24-months | 376         | new vs non-user      | CHC A: d=-0.12 (-0.38, 0.13)<br>CHC B: d=-0.02 (-0.27, 0.23)  | Quasi                 | Very Serious           |                        |           |           |           | Precise  |         |
|                  | Gersten 2016   | 12-18           | 12-months | 859         | new vs non-user      | CHC A: -0.65 (-1.05, -0.25)<br>CHC B: -0.32 (-0.09, 0.72)     | Quasi                 | Very Serious           |                        |           |           |           | precise  |         |
|                  | Hansen 1991    | post menopausal | 12-years  | 121         | previous vs non-user | NS                                                            | PC                    | Very Serious           |                        |           |           |           | unclear  |         |
| Femoral Neck BMD | Hartard 2006   | 18-24           | 12-months | 59          | ongoing vs non-user  | CHC A: d= 0.10 (-0.53, 0.74)<br>CHC B: d= 0.12 (-0.53, 0.76)  | Quasi                 | Very Serious           | Consistent             | Indirect  | imprecise |           | Very Low |         |
|                  | Jackowski 2016 | 8-33            | 20-years  | 110         | ongoing vs non-user  | NS                                                            | RC                    | Serious                |                        |           |           |           | unclear  |         |
|                  | Liu 2011       | 25-40           | 24-months | 154         | new vs non-user      | CHC A: d=-0.15 (-0.55, 0.24)<br>CHC B: d= -0.01 (-0.39, 0.37) | Quasi                 | Very Serious           |                        |           |           |           | precise  |         |
|                  | Massai 2005    | 18-35           | 24-months | 107         | ongoing vs non-user  | -0.27 (-0.38, -0.15)                                          | Quasi                 | Very Serious           |                        |           |           |           | precise  |         |
|                  | Mazess 1991    | 20-39           | 24-months | 300         | ongoing vs non-user  | d=-0.19 (-0.57, 0.19)                                         | PC                    | Very Serious           |                        |           |           |           | Precise  |         |
|                  | Reed 2003      | 18-39           | 36-months | 178         | ongoing vs non-user  | p=0.55                                                        | PC                    | Not Serious            |                        |           |           |           | unclear  |         |
|                  | Rome 2004      | 12-18           | 12-months | 317         | new vs non-user      | NR                                                            | PC                    | Very Serious           |                        |           |           |           | unclear  |         |
|                  | Weaver 2001    | 18-31           | ?         | 141         | ongoing vs non-user  | NS                                                            | RCT                   | Very Serious           |                        |           |           |           | unclear  |         |
|                  |                | <b>Overall</b>  |           |             | <b>3314</b>          |                                                               |                       | <b>High Quality +4</b> | <b>Very Serious -2</b> | <b>0</b>  | <b>-1</b> | <b>-1</b> | <b>0</b> |         |
|                  |                | Biason 2015     | 12-19     | 12-months   | 61                   | new vs non-user                                               | 0.0444                | Quasi                  | Very Serious           |           |           |           |          | Unclear |
|                  | Cobb 2002      | 18-30           | ?         | 476         | past vs non-user     | Beta -0.000054 ± 0.00012                                      | RC                    | Not Serious            |                        |           |           |           | Precise  |         |
| Whole Body BMD   | Gersten 2016   | 12-18           | 12-months | 859         | new vs non-user      | CHC A: 0.43 (0.03, 0.82)<br>CHC B: 0.40 (0.01, 0.80)          | Quasi                 | Very Serious           | Unclear                | Indirect  | precise   |           | Very Low |         |
|                  | Jackowski 2016 | 8-33            | 20-years  | 110         | ongoing vs non-user  | NS                                                            | RC                    | Serious                |                        |           |           |           | Unclear  |         |
|                  | Reed 2003      | 18-39           | 36-months | 178         | ongoing vs non-user  | p=0.96                                                        | PC                    | Not Serious            |                        |           |           |           | Unclear  |         |
|                  | Scholes 2011   | 14-30           | 36-months | 139         | ongoing vs non-user  | NS                                                            | PC                    | Not serious            |                        |           |           |           | Unclear  |         |
|                  | Almstedt 2020  | 18-20           | 12-months | 62          | ongoing vs non-user  | NR                                                            | PC                    | Very Serious           |                        |           |           |           | Unclear  |         |

|                  |                   |       |                |             |                           |                                                                 |                        |                        |              |           |           |           |
|------------------|-------------------|-------|----------------|-------------|---------------------------|-----------------------------------------------------------------|------------------------|------------------------|--------------|-----------|-----------|-----------|
|                  | O'Leary 2021      | 19-30 | 44-weeks       | 29          | ongoing vs non-user       | p≥0.11                                                          | PC                     | Very Serious           |              |           |           | Unclear   |
|                  | <b>Overall</b>    |       |                | <b>1914</b> |                           |                                                                 | <b>Mod Quality +3</b>  | <b>Very Serious -2</b> | <b>-1</b>    | <b>-1</b> | <b>-1</b> | <b>-2</b> |
|                  | Elgan 2003        | 18-26 | 24-months      | 118         | new vs. ongoing user      | - 1.5 ± 0.49                                                    | RC                     | Very Serious           |              |           |           |           |
|                  | Nappi 2003        | 22-34 | 12-months      | 56          | new vs. non-user          | p<0.05                                                          | Quasi                  | Very Serious           |              |           |           |           |
| D-PYD            | Rome 2004         | 12-18 | 12-months      | 317         | new vs. non-user          | p=0.08                                                          | PC                     | Very Serious           | Unclear      | Direct    | Unclear   | Very Low  |
|                  | Nappi 2005        | 22-34 | 12-months      | 67          | new vs. non-user          | p<0.05                                                          | Quasi                  | Very Serious           |              |           |           |           |
|                  | Gargano 2008      | 21-34 | 12-months      | 61          | new vs. non-user          | NR                                                              | Quasi                  | Very Serious           |              |           |           |           |
|                  | Massaro 2010      | 23-34 | 12-months      | 49          | new vs. non-user          | NS                                                              | Quasi                  | Very Serious           |              |           |           |           |
|                  | <b>Overall</b>    |       |                | <b>668</b>  |                           |                                                                 | <b>Mod Quality +3</b>  | <b>Very Serious -2</b> | <b>-1</b>    | <b>0</b>  | <b>-1</b> | <b>-1</b> |
|                  | Reiger 2016       | 28-25 | Baseline       | 23          | ongoing vs. non-user      | NS                                                              | PC                     | Very Serious           |              |           |           |           |
|                  | Almstedt 2020     | 18-20 | 12-months      | 62          | ongoing vs. non-user      | NS                                                              | PC                     | Very Serious           |              |           |           |           |
| CTX              | Martin 2021       | ?     | One pill cycle | 28          | ongoing vs. non-user      | p=0.37                                                          | PC                     | Very Serious           | Consistent   | Indirect  | Unclear   | Very Low  |
|                  | O'Leary 2021      | 19-30 | 44-weeks       | 29          | ongoing vs. non-user      | p≥0.13                                                          | PC                     | Very Serious           |              |           |           |           |
|                  | He 2022           | young | One pill cycle | 38          | ongoing vs. previous user | p<0.01                                                          | PC                     | Serious                |              |           |           |           |
|                  | <b>Overall</b>    |       |                | <b>180</b>  |                           |                                                                 | <b>Mod Quality +3</b>  | <b>Very Serious -2</b> | <b>0</b>     | <b>-1</b> | <b>-1</b> | <b>-1</b> |
|                  | Procter-Gray 2008 | 18-26 | 26.6-months    | 101         | new vs non-user           | 0.77 ± 0.17                                                     | RCT                    | Very Serious           |              |           |           |           |
|                  | Almstedt 2020     | 18-20 | 12-months      | 62          | ongoing vs non-user       | NR                                                              | PC                     | Very Serious           |              |           |           |           |
| LBM              | Bonny 2009        | 12-18 | 6-months       | 36          | new vs non-user           | p=0.07                                                          | Quasi                  | Very Serious           | Unclear      | Indirect  | Unclear   | Very Low  |
|                  | Cobb 2002         | 18-30 | ?              | 476         | past vs non-user          | NR                                                              | RC                     | Not Serious            |              |           |           |           |
|                  | Dalgaard 2020     | 18-30 | 10-weeks       | 38          | ongoing vs non-user       | d= -0.1 (-0.74, 0.54)                                           | PC                     | Very Serious           |              |           |           |           |
|                  | <b>Overall</b>    |       |                | <b>713</b>  |                           |                                                                 | <b>High Quality +4</b> | <b>Very Serious -2</b> | <b>-1</b>    | <b>-1</b> | <b>-1</b> | <b>-1</b> |
|                  | Biason 2015       | 12-19 | 12-months      | 61          | new vs non-user           | 0.153                                                           | Quasi                  | Very Serious           |              |           |           | Unclear   |
|                  | Gersten 2016      | 12-18 | 12-months      | 859         | new vs non-user           | CHC A: 0.27 (-0.33, 0.87)<br>CHC B: 1.45 (0.85, 2.06)           | Quasi                  | Very Serious           |              |           |           | Precise   |
| Lumbar Spine BMC | Hartard 2006      | 18-24 | 12-months      | 59          | ongoing vs non-user       | CHC A: d= -0.65 (-1.30, -0.01)<br>CHC B: d= -0.40 (-1.05, 0.25) | Quasi                  | Very Serious           | Inconsistent | Indirect  | Imprecise | Very Low  |
|                  | Jackowski 2016    | 8-33  | 20-years       | 110         | ongoing vs non-user       | NS                                                              | RC                     | Serious                |              |           |           | Unclear   |
|                  | Weaver 2001       | 18-31 | ?              | 141         | ongoing vs non-user       | NS                                                              | RCT                    | Very Serious           |              |           |           | Unclear   |

|                | Overall        |       |                       |                     |                           |                                                       | 1230    | Mod Quality +3  | Very Serious -2 | -1       | -1      | -1       | -2 |
|----------------|----------------|-------|-----------------------|---------------------|---------------------------|-------------------------------------------------------|---------|-----------------|-----------------|----------|---------|----------|----|
| Whole Body BMC | Biason 2015    | 12-19 | 12-months             | 61                  | new vs non-user           | 0.1012                                                | Quasi   | Very Serious    |                 |          |         | Unclear  |    |
|                | Cobb 2007      | 18-26 | 24-months             | 150                 | new vs non-user           | 6.2±5.2                                               | RCT     | Very Serious    |                 |          |         | Precise  |    |
|                | Gersten 2016   | 12-18 | 12-months             | 859                 | new vs non-user           | CHC A: 0.53 (-0.43, 1.48)<br>CHC B: 1.01 (0.05, 1.96) | Quasi   | Very Serious    | Unclear         | Direct   | Precise | Very Low |    |
|                | Jackowski 2016 | 8-33  | 20-years              | 110                 | ongoing vs non-user       | NS                                                    | RC      | Serious         |                 |          |         | Unclear  |    |
|                | Weaver 2001    | 18-31 | ?                     | 141                 | ongoing vs non-user       | NS                                                    | RCT     | Very Serious    |                 |          |         | Unclear  |    |
|                | Overall        |       |                       |                     |                           |                                                       | 1321    | High Quality +4 | Very Serious -2 | -1       | 0       | -1       | 0  |
| Any Fracture   | Cooper 1993    | 29    | ?                     | NR                  | ongoing vs. non-user      | aRR: 1.20 (1.08,1.34)                                 | PC      | Not serious     |                 |          |         | precise  |    |
|                | Vessey 1998    | 25-39 | 26 years              | 310000 person years | ongoing vs. non-user      | aRR: 1.2 (1.1, 1.4)                                   | RC      | Very Serious    | Consistent      | direct   | precise | Low      |    |
|                | Barad 2005     | 50-79 | ~ 2.5 years           | 80947               | ongoing vs. non-user      | aHR: 1.02 (.91,1.14)                                  | PC      | Serious         |                 |          | precise |          |    |
|                | Yoo 2021       | ?     | 99.6 (96-103.2)months | 1272115             | ongoing vs. non-user      | aHR: 1.03 (1.01-1.05)                                 | RC      | Not serious     |                 |          | precise |          |    |
|                | Overall        |       |                       |                     |                           |                                                       | 1663062 | Mod Quality +3  | Serious -1      | 0        | 0       | 0        | +2 |
| P1NP           | Allaway 2020   | 18-30 | ~87-days              | 24                  | User vs. non-user         | NR                                                    | Quasi   | Very Serious    |                 |          |         |          |    |
|                | Martin 2021    | 18-35 | One pill cycle        | 28                  | ongoing vs. non-user      | p=0.81                                                | PC      | Very Serious    |                 |          |         |          |    |
|                | O'Leary 2021   | 19-30 | 44-weeks              | 29                  | ongoing vs. non-user      | p=0.10                                                | PC      | Very Serious    | Consistent      | Indirect | Unclear | Very Low |    |
|                | He 2022        | young | One pill cycle        | 38                  | ongoing vs. previous user | p=0.11                                                | PC      | Very Serious    |                 |          |         |          |    |
|                | Overall        |       |                       |                     |                           |                                                       | 119     | Mod Quality +3  | Very Serious -2 | 0        | -1      | -1       | -1 |
| PYD            | Nappi 2003     | 22-34 | 12-months             | 56                  | new vs. non-user          | p<0.05                                                | Quasi   | Very Serious    |                 |          |         |          |    |
|                | Nappi 2005     | 22-34 | 12-months             | 67                  | new vs. non-user          | p<0.05                                                | Quasi   | Very Serious    | Consistent      | direct   | Unclear | Very Low |    |
|                | Gargano 2008   | 21-34 | 12-months             | 61                  | new vs. non-user          | NR                                                    | Quasi   | Very Serious    |                 |          |         |          |    |
|                | Massaro 2010   | 23-34 | 12-months             | 49                  | new vs. non-user          | p<0.05                                                | Quasi   | Very Serious    |                 |          |         |          |    |
|                | Overall        |       |                       |                     |                           |                                                       | 233     | Low Quality +2  | Very Serious -2 | 0        | 0       | -1       | -1 |
| BAP            | O'Leary 2021   | 19-30 | 44-weeks              | 29                  | ongoing vs non-user       | p>0.05                                                | PC      | Very Serious    |                 |          |         |          |    |
|                | Martin 2021    | 18-35 | One pill cycle        | 28                  | ongoing vs non-user       | p=0.47                                                | PC      | Very Serious    | Unclear         | Indirect | Unclear | Very Low |    |
|                | Reiger 2016    | 28-35 | Baseline              | 23                  | ongoing vs non-user       | NR                                                    | PC      | Very Serious    |                 |          |         |          |    |
|                | Rome 2004      | 12-18 | 12-months             | 317                 | new vs non-user           | p=0.004                                               | PC      | Very Serious    |                 |          |         |          |    |
|                | Overall        |       |                       |                     |                           |                                                       | 397     | Mod Quality +3  | Very Serious -2 | -1       | -1      | -1       | -2 |
| BGP            | Nappi 2003     | 22-34 | 12-months             | 56                  | new vs. non-user          | NS                                                    | Quasi   | Very Serious    | Unclear         | Direct   | Unclear | Very Low |    |



|                         |                |             |                  |                |                            |                                                             |                        |                        |              |           |           |                       |
|-------------------------|----------------|-------------|------------------|----------------|----------------------------|-------------------------------------------------------------|------------------------|------------------------|--------------|-----------|-----------|-----------------------|
|                         | Nappi 2005     | 22-34       | 12-months        | 67             | new vs. non-user           | NR                                                          | Quasi                  | Very Serious           |              |           |           |                       |
|                         | Gargano 2008   | 21-34       | 12-months        | 61             | new vs. non-user           | NR                                                          | Quasi                  | Very Serious           |              |           |           |                       |
|                         | Massaro 2010   | 23-34       | 12-months        | 49             | new vs. non-user           | p<0.05                                                      | Quasi                  | Very Serious           |              |           |           |                       |
|                         | <b>Overall</b> |             |                  | <b>233</b>     |                            |                                                             | <b>Low Quality +2</b>  | <b>Very Serious -2</b> | <b>-1</b>    | <b>0</b>  | <b>-1</b> | <b>-2</b>             |
| Radius BMD              | Beksinska 2009 | 15-19       | 60-months        | 155            | new vs non-user            | p=0.01                                                      | PC                     | Not serious            |              |           |           | Unclear               |
|                         | Hartard 2006   | 18-24       | 12-months        | 59             | ongoing vs non-user        | CHC A: d=0.17 (-0.47, 0.80)<br>CHC B: d= -0.3 (-0.96, 0.36) | Quasi                  | Very Serious           | Consistent   | Direct    |           | Imprecise<br>Very Low |
|                         | Mazess 1991    | 20-39       | 24-months        | 300            | ongoing vs non-user        | d= 0.0 (-0.33, 0.33)                                        | PC                     | Very Serious           |              |           |           | Precise               |
|                         | Weaver 2001    | 18-31       | ?                | 141            | ongoing vs non-user        | NS                                                          | RCT                    | Very Serious           |              |           |           | Unclear               |
|                         | <b>Overall</b> |             |                  | <b>655</b>     |                            |                                                             | <b>High quality +4</b> | <b>Very Serious -2</b> | <b>0</b>     | <b>0</b>  | <b>-1</b> | <b>1</b>              |
| Total Hip BMD           | Brajic 2018    | 16-24       | 24-months        | 307            | ongoing vs non-user        | -0.001 (-0.009, 0.006)                                      | PC                     | Serious                |              |           |           | Imprecise             |
|                         | Cobb 2002      | 18-30       | 7-years          | 476            | past vs non-user           | Beta -0.000012 ± 0.0002                                     | RC                     | Not Serious            | Inconsistent | Indirect  |           | Imprecise<br>Very Low |
|                         | Scholes 2011   | 14-30       | 36-months        | 139            | ongoing vs non-user        | NS                                                          | PC                     | Not serious            |              |           |           | Unclear               |
|                         | Cobb 2007      | 18-26       | 24-months        | 150            | new vs non-user            | 0.0035±0.0022                                               | RCT                    | Very Serious           |              |           |           | Precise               |
|                         | <b>Overall</b> |             |                  | <b>1072</b>    |                            |                                                             | <b>High Quality +4</b> | <b>Serious -1</b>      | <b>-1</b>    | <b>-1</b> | <b>-1</b> | <b>0</b>              |
| Total Knee Arthroplasty | Liu 2009       | Middle aged | 6.1 person-years | 1291767        |                            | aRR: 1.00 (0.96, 1.04)                                      | PC                     | Not serious            |              |           |           | precise               |
|                         | Hellevik 2017  | ≥20         | 8.3 ± 4.5 years  | 18126          | Previous user vs. non-user | aHR: 1.36 (1.00, 1.86)                                      | PC                     | Serious                | Consistent   | direct    |           | precise<br>Low        |
|                         | Leung 2019     | 45-74       | 14.8 years       | 35185          |                            | aHR: 1.18 (1.05, 1.32)                                      | PC                     | Serious                |              |           |           | precise               |
|                         | <b>Overall</b> |             |                  | <b>1345078</b> |                            |                                                             | <b>Mod Quality +3</b>  | <b>Serious -1</b>      | <b>0</b>     | <b>0</b>  | <b>0</b>  | <b>(+2)</b>           |

aHR (adjusted hazard ratio), aRR (adjusted risk ratio), BAP (bone alkaline phosphatase), BGP (Osteocalcin), BMC (bone mineral content), BMD (bone mineral density), CHC (combined hormonal contraceptive), CTX (C-terminal peptide), d (Cohen's d effect size), D-PYD (Deoxypyridinoline), GRADE (Grading of Recommendations Assessment, Development and Evaluation), LBM (lean body mass), Mod (moderate), NR (not reported), NS (not significant, only used when that is what was reported) P1NP (Procollagen type 1 terminal peptide), PC (prospective cohort), PYD (Pyridinoline), TKA (total knee arthroplasty), Quasi (Quasi experimental study), RC (retrospective cohort), RCT (randomized controlled trial)

<sup>1</sup>not serious (≥12/13), serious (11/13), Very serious (≤10/13) based on questions 14 to 26 on the Downs and Black Tool

<sup>2</sup>Consistency based on overlap of the 95%CI for similar statistics, approximately two-thirds need to overlap to be consistent.
